1 **Concurrence of Porin Loss and Modular Amplification of  $\beta$ -Lactamase Encoding Genes**  
2 **Drives Carbapenem Resistance in a Cohort of Recurrent *Enterobacterales* Bacteremia**

3

4 William C. Shropshire<sup>1,2</sup>, Samuel L. Aitken<sup>2,3</sup>, Reed Pifer<sup>4</sup>, Jiwoong Kim<sup>5</sup>, Micah M. Bhatti<sup>6</sup>,

5 Xiqi Li<sup>7</sup>, Awdhesh Kalia<sup>8</sup>, Jessica Galloway-Peña<sup>2,7,9</sup>, Pranoti Sahasrabhojane<sup>7</sup>, Cesar A.

6 Arias<sup>1,2,10,11</sup>, David E. Greenberg<sup>2,12,13</sup>, Blake M. Hanson<sup>1,2</sup>, Samuel A. Shelburne<sup>2,7,9#</sup>

7

8 <sup>1</sup>Center for Infectious Diseases, School of Public Health, University of Texas Health Science

9 Center, Houston, Texas, USA

10 <sup>2</sup>Center for Antimicrobial Resistance and Microbial Genomics, Division of Infectious Diseases,

11 University of Texas McGovern Medical School at Houston, Houston, Texas, USA

12 <sup>3</sup>Division of Pharmacy, MD Anderson Cancer Center, Houston, Texas, USA

13 <sup>4</sup>Division of Infectious Diseases, Department of Internal Medicine, University of Texas

14 McGovern Medical School at Houston, Houston, Texas, USA

15 <sup>5</sup>Department of Bioinformatics, UT Southwestern Medical Center, Dallas, Texas, USA

16 <sup>6</sup>Department of Laboratory Medicine, MD Anderson Cancer Center, Houston, Texas, USA

17 <sup>7</sup>Department of Infectious Diseases, MD Anderson Cancer Center, Houston, Texas, USA

18 <sup>8</sup>Graduate Program in Diagnostic Genetics, School of Health Professions, The University of

19 Texas M.D. Anderson Cancer Center, Houston, Texas, USA

20 <sup>9</sup>Department of Genomic Medicine, MD Anderson Cancer Center, Houston, Texas, USA

21 <sup>10</sup>Department of Microbiology and Molecular Genetics, University of Texas McGovern Medical  
22 School at Houston, Houston, Texas, USA

23 <sup>11</sup>Molecular Genetics and Antimicrobial Resistance Unit-International Center for Microbial  
24 Genomics, Universidad El Bosque, Bogotá, Colombia.

25 <sup>12</sup>Department of Internal Medicine, UT Southwestern, Dallas, Texas, USA

26 <sup>13</sup>Department of Microbiology, UT Southwestern, Dallas, Texas, USA

27

28 #Address correspondence to Samuel A. Shelburne, MD, PhD, [sshelburne@mdanderson.org](mailto:sshelburne@mdanderson.org)

29

## 30 **ABSTRACT**

### 31 **Background**

32 Carbapenem resistant *Enterobacteriales* (CRE) remain urgent antimicrobial resistance threats.  
33 Approximately half of CRE clinical isolates lack carbapenem hydrolyzing enzymes and develop  
34 carbapenem resistance through alternative mechanisms. The purpose of this study was to  
35 elucidate the development of carbapenem resistance mechanisms from clonal, recurrent  
36 extended-spectrum  $\beta$ -lactamase positive *Enterobacteriales* (ESBL-E) bacteremia isolates in a  
37 vulnerable patient population.

### 38 **Methods**

39 This study investigated a historical, retrospective cohort of ESBL-E bacteremia cases in the  
40 University of Texas MD Anderson Cancer Center (MDACC) from January 2015 to July 2016.  
41 Phylogenetic and comparative genomic analyses were performed to identify clonal, recurrent  
42 ESBL-E isolates developing carbapenem resistance. Oxford Nanopore Technology (ONT) long-  
43 read and Illumina short-read sequencing data were used to generate consensus assemblies and to  
44 identify signatures of mobile genetic element mediated amplification and transposition of  
45 antimicrobial resistance genes. Serial passaging experiments were performed on a set of clinical  
46 ST131 ESBL-E isolates to recapitulate *in vivo* observations. qPCR and qRT-PCR were used to  
47 determine respective copy number and transcript levels of  $\beta$ -lactamase genes.

### 48 **Results**

49 116 ESBL-E bacteremia cases were identified, 16 of which had documented recurrent infections.  
50 Four serial, recurrent isolates displayed a carbapenem resistant phenotype, three without the  
51 acquisition of a known carbapenemase. These three isolates had non-carbapenemase-producing  
52 CRE (non-CP-CRE) mechanisms driven by IS26- and *ISEcpI*-mediated amplification of

53 respective translocatable units (TU) and transposition units (TPU) harboring both *bla*<sub>OXA-1</sub> and  
54 *bla*<sub>CTX-M</sub> variants with concomitant outer membrane porin disruption. The TU and TPU  
55 structures inserted into the open reading frames of outer membrane porin genes in a subset of  
56 non-CP-CRE isolates. Serial passage of an index ST131 ESBL-E isolate under selective  
57 carbapenem exposure resulted in chromosomal amplification of modular, TUs harboring  $\beta$ -  
58 lactamase genes with concomitant porin inactivation, recapitulating the *in vivo* carbapenem  
59 resistance progression. Long-read sequencing of two additional MDACC bacteremia strains  
60 identified similar non-CP-CRE mechanisms observed in the serial isolates.

## 61 **Conclusions**

62 Non-CP-CRE *de novo* mechanisms were the primary driver of CRE development in recurrent  
63 bacteremia cases within this vulnerable patient population. The incorporation of long-read ONT  
64 data into AMR surveillance platforms is critical to identify high-risk CRE isolates that are  
65 difficult to identify with low-resolution phenotypic and molecular characterization methods.

66

## 67 **Keywords:**

68 Non-carbapenemase-producing carbapenem resistant *Enterobacterales*, Oxford Nanopore  
69 Technologies MinION Sequencing, Mobile Genetic Element Amplifications, Mobile Genetic  
70 Element Transpositions

71

## 72 **BACKGROUND**

73 Antimicrobial resistance (AMR) is an emerging global health priority and carbapenem resistant  
74 *Enterobacterales* (CRE) are among the most serious AMR threats (1). Carbapenem resistance  
75 can develop due to the acquisition of enzymes that hydrolyze carbapenems, known as  
76 carbapenemases, as well as through changes in outer membrane permeability and/or drug efflux  
77 activity, which decrease intracellular carbapenem concentrations (2). While most CRE research  
78 has focused on characterizing carbapenemases (2), recent clinical and molecular epidemiology  
79 studies indicate approximately 50% of CRE isolates are not carbapenemase carriers, suggesting a  
80 substantial proportion of CRE isolates develop carbapenem resistance through alternative  
81 mechanisms (3, 4). Molecular characterization of these alternative mechanisms indicate non  
82 carbapenemase-producing carbapenem resistant *Enterobacterales* (non-CP-CRE) generally carry  
83 extended-spectrum  $\beta$ -lactamases (ESBL) or AmpC-like enzymes with concomitant mutations  
84 that alter porin function (2). Further studies reveal that *Enterobacterales* strains carrying outer  
85 membrane porin mutations, but lacking ESBL or AmpC-like enzymes, develop *de novo*  
86 carbapenem resistance at lower rates during serial passage under increasing carbapenem  
87 concentrations (5, 6). Thus, the presence of ESBL or cephalosporinase genes may be a  
88 component cause in non-CP-CRE development. Additionally, van Boxtel et al. demonstrated that  
89 serial passaging of an ESBL or AmpC-producing isolate in the presence of a carbapenem can  
90 result in amplification of plasmid-borne  $\beta$ -lactamase genes (7). Increased expression of the  
91 narrow-spectrum TEM  $\beta$ -lactamases has similarly been reported to result in cefepime (8) and  
92 piperacillin-tazobactam resistance (9-11), indicating that  $\beta$ -lactamase gene dosage is a factor in  
93 increasing resistance to multiple  $\beta$ -lactam chemotherapies. These findings demonstrate  
94 expression level and copy number of  $\beta$ -lactamases without known carbapenemase activity have

95 important effects on carbapenem susceptibility in porin deficient backgrounds (6, 7).  
96 Nevertheless, there remains a gap in knowledge regarding how these non-CP-CRE mechanisms  
97 evolve *in vivo*, as few existing studies have investigated serially collected isolates from large,  
98 patient cohorts (12-16).

99

100 This gap in knowledge is particularly relevant in carbapenem resistant *Escherichia coli*, where  
101 the majority of these isolates are non-CP-CRE (3, 4). Additionally, *Klebsiella pneumoniae*  
102 isolates with non-CP-CRE phenotypes have also been identified, albeit less frequently (3, 4).  
103 Both non-CP-CR *E. coli* and *K. pneumoniae* can cause severe disease, including bacteremia,  
104 which have high mortality rates (17). The detection and treatment of infections with these non-  
105 CP-CRE isolates remain challenging relative to carbapenemase producing CRE as phenotypic  
106 tests may incorrectly identify these isolates as carbapenem susceptible and definitive therapy  
107 options may not be readily evident. This highlights the importance to further characterize non-  
108 CP-CRE mechanism development, which may provide insights into new surveillance and/or  
109 treatment options. Since there remains a lack of studies fully characterizing non-CP-CRE  
110 development, we performed a systematic analysis of non-CP-CRE mechanisms using a large  
111 cohort of patients with whole genome sequencing (WGS).

112

113 We utilized a cohort of patients with ESBL-E bacteremia from the University of Texas MD  
114 Anderson Cancer Center (MDACC). Importantly, analysis of a previous MDACC cohort of non-  
115 CP-CRE bacteremia isolates indicated these strains had increased short-read mapping of  $\beta$ -  
116 lactamase encoding genes suggestive of  $\beta$ -lactamase encoding gene amplification (18).  
117 Nevertheless, the amplification structures and genomic context of these gene amplifications

118 could not be discerned with this short-read sequencing analysis. This is due to inherent  
119 limitations with short-read sequencing assemblers, which have difficulties resolving the  
120 complex, repetitive mobile genetic elements (MGEs) that carry resistance genes (19). Therefore,  
121 we present an analysis utilizing Oxford Nanopore Technologies (ONT) MinION sequencing, a  
122 long-read sequencing platform, which overcomes these limitations to elucidate these  
123 amplification mechanisms. This study aims to track the *de novo* development of carbapenem  
124 resistance mechanisms during recurrent *Enterobacteriales* bacteremia infection by specifically  
125 focusing on ESBL positive *E. coli* and *K. pneumoniae* strains and characterizing the non-CP-  
126 CRE associated  $\beta$ -lactamase amplification mechanisms within our cohort.

127

## 128 **METHODS**

### 129 **Study design and clinical data abstraction**

130 A retrospective review of patients with ESBL-E bacteremia hospitalized from January 2015 to  
131 July 2016 was conducted at MDACC in Houston, Texas. All patients with one or more episodes  
132 of ESBL-E bacteremia who were 18 years of age or greater were eligible for inclusion. Blood  
133 culture isolates are routinely saved at MDACC and stored at -80°C. Clinical and demographic  
134 characteristics were manually extracted from electronic medical records and recorded using  
135 REDCap software (Vanderbilt University, Nashville, TN) (20).

136

### 137 **Isolate identification and antimicrobial susceptibility testing**

138 Antibiotic susceptibility testing was performed per routine clinical laboratory practice using an  
139 automated system (Vitek2, bioMérieux, Marcy L'Étoile, France) with additional testing  
140 performed as needed using individual antibiotic gradient strips (Etest, bioMérieux). ESBL

141 production was assessed per routine laboratory practice on *E. coli*, *K. pneumonia*, and *K. oxytoca*  
142 isolates that were resistant to one or more oxyimino-cephalosporins (e.g. cefotaxime,  
143 ceftriaxone, or ceftazidime) using either the ESBL Etest (bioMérieux) or the Rapid ESBL Screen  
144 kit (ROSCO, Taastrup, Denmark). Carbapenemase production was evaluated in the clinical lab  
145 on any *Enterobacterales* isolate resistant to one more of the carbapenems using the Neo-Rapid  
146 CARB kit (ROSCO) according to manufacturer's instructions. Carbapenem resistance (CR) was  
147 defined as resistance to either ertapenem or meropenem using CLSI criteria (21). Recurrent  
148 *Enterobacterales* bacteremia was defined as identification of the same species in blood culture at  
149 any point during the follow-up period following at least one negative blood culture and  
150 completion of an antibiotic treatment regimen.

151

### 152 **Illumina short-read sequencing**

153 All available isolates from recurrent bacteremia patients, initially underwent whole genome  
154 sequencing (WGS) via Illumina HiSeq as described previously (18). The paired-end short-reads  
155 were assessed using the FastQC toolkit (Babraham Institute), and adaptors as well as low-quality  
156 reads were trimmed using Trimmomatic v0.33 (22). Genome assembly was performed using  
157 SPAdes v3.9.1 (23). Depth of short read mapping to individual genes of interest was quantitated  
158 relative to the average read mapping depth for the pubMLST housekeeping gene schema for *E.*  
159 *coli* ST10 and ST131 respectively.

160

### 161 **Oxford Nanopore Technologies (ONT) long-read sequencing**

162 Serial isolates that developed non-CP-CRE, isolates used in the serial passaging experiments,  
163 and non-CP-CRE isolates from a previous study (18) underwent Oxford Nanopore Technologies



164 (ONT) long-read sequencing. Library preps were completed using the SQK-RBK004 rapid  
165 barcoding kit with ~400 ng of input DNA and run on ONT MinION R9.4.1 flow cells using the  
166 ONT GridION X5 (Oxford, UK) per manufacturer’s instructions. ONT fast5 data was generated  
167 using ONT MinKNOW software (v3.0.13) with subsequent base-calling using Guppy v3.2.2  
168 software (Oxford, UK). qcat-v1.1.0 was used for read demultiplexing, read length filtering  
169 (>1000 bp), and barcode removal (nanoporetech qcat GitHub:  
170 <https://github.com/nanoporetech/qcat>). A custom python script was used for the generation of  
171 polished, consensus assemblies (Shropshire, W flye\_hybrid\_assembly\_pipeline GitHub:  
172 [https://github.com/wshropshire/flye\\_hybrid\\_assembly\\_pipeline](https://github.com/wshropshire/flye_hybrid_assembly_pipeline)  
173 ). Briefly, the Flye-v2.5 (24) assembler was used for *de novo* assembly, and contigs were  
174 circularized using berokka-v0.2 (Seemann, T berokka GitHub:  
175 <https://github.com/tseemann/berokka>). The circlator v1.5.5 (25) ‘clean’ command was then used  
176 to remove duplicate contigs sharing at least 90% identity. The remaining contigs were polished  
177 with Racon-v.1.4.5 (26) using the Oxford Nanopore long reads and then re-oriented with  
178 Circlator (25) “fixstart” to standardize the chromosome to the *dnaA* gene. A second long-read  
179 polish was then performed with Racon-v1.4.5 and these polished, corrected contigs were used as  
180 input for Medaka v0.8.1 long-read polishing (nanoporetech medaka GitHub:  
181 <https://github.com/nanoporetech/medaka>) followed by multiple rounds of Illumina short-read  
182 polishing using Racon-v1.4.5 (26). ONT assembly metrics are provided in **Table S1**.

183

#### 184 **Phylogenetics, genetic variant calling, and clonality analysis**

185 Phylogenetic analysis, *in silico* MLST, and subsequent variant-calling of serial isolates compared  
186 against the index strain ONT consensus assembly were used to determine clonality. Initially, the

187 pan-genome pipeline tool Roary-v3.12.0 (27) was used to perform a core genome alignment of  
188 the short-read SPAdes assemblies using the probabilistic alignment program PRANK (27, 28). A  
189 core genome pairwise SNP distance matrix was generated with these data using a custom Python  
190 script (Narechania, A  
191 GitHub:[https://github.com/narechan/amnh/blob/master/bin/snp\\_matrixBuilder.pl](https://github.com/narechan/amnh/blob/master/bin/snp_matrixBuilder.pl)), which was  
192 subsequently used to build a maximum likelihood (ML) phylogenetic tree using RAxML-v8.2.12  
193 (29). *In silico* multi-locus sequencing typing (MLST) was performed on the short-read SPAdes  
194 assemblies using mlst-v2.15.1 (Seemann, T mlst Github: <https://github.com/tseemann/mlst>; (30).  
195 Recurrent isolates that became non-CP-CRE were checked for clonality using the variant calling  
196 pipeline tool Snippy-v4.3.6 (Seemann, T snippy GitHub: <https://github.com/tseemann/snippy>)  
197 with INDELS removed.

198

### 199 **Genome annotation, AMR gene, and MGE identification**

200 Gene calling and functional annotation was performed using Prokka-v1.14.0 (31). Annotated  
201 consensus genomes, as well as individual contigs, were parsed with ABRicate (Seemann, T  
202 ABRicate Github: <https://github.com/tseemann/abricate>) using the Comprehensive Antibiotic  
203 Resistance Database (CARD) (32) and PlasmidFinder (33) to search for AMR determinants and  
204 plasmid signatures respectively. Additionally, annotated Prokka gbk files were used to  
205 characterize ORFs of interests as well as confirm the results found with ABRicate. CARD,  
206 PlasmidFinder, ISFinder (34) and BLAST webtools were utilized during manual inspection of  
207 the assemblies to ensure correct context of annotated features, identify inverted repeat regions  
208 and target site duplications of insertion sequences, and confirm likely AMR gene mutations if  
209 present.

210

211 In cases where assemblies were not completely resolved due to putative large repeat regions that  
212 could not be fully captured on ONT long reads, we used a newly developed tool SVAnts-v0.1  
213 (35) (Hanson, Blake SVAnts Github: <https://github.com/EpiBlake/SVAnts>) to investigate subsets  
214 of ONT long reads. This tool enabled us to find individual ONT long reads containing MGEs of  
215 interest and align the DNA bordering these MGEs to our index assemblies to identify the regions  
216 in which the MGE was inserted within each bacterial genome.

217

### 218 **B-lactamase encoding gene and gene transcript level analysis**

219 Quantitative PCR (qPCR) and quantitative real-time PCR (qRT-PCR) was used to assess both  
220 DNA copy number and RNA transcript levels respectively. Strains were grown in triplicate on  
221 two separate days (six biologic replicates) to mid-exponential phase ( $OD_{600} \sim 0.5$ ) in Luria-  
222 Bertani (LB) broth (ThermoFisher) at 37° C shaking at 220 rpm. DNA isolation was performed  
223 using the DNEasy kit (Qiagen) and qPCR was performed using TaqMan reagents on the StepOne  
224 Plus Real Time PCR platform (Applied Biosystems). The DNA levels of *bla*<sub>OXA-1</sub> and *bla*<sub>CTX-M</sub>  
225 were determined relative to the *rpsL* control gene using the  $\Delta C_t$  method (6).

226

227 For RNA transcript level analysis, cells were mixed 1:2 with RNAProtect (Qiagen) and  
228 harvested via centrifugation. RNA was isolated from cell pellets using the RNEasy kit (Qiagen)  
229 and converted to cDNA using the High Capacity cDNA Reverse Transcription Kit (Applied  
230 Biosystems). Relative transcript levels of the  $\beta$ -lactamase encoding genes (*bla*<sub>OXA-1</sub> and *bla*<sub>CTX-M</sub>)  
231 were assayed using TaqMan reagents on the StepOne Plus Real Time PCR machine (Applied  
232 Biosystems). The transcript level of *bla*<sub>OXA-1</sub> and *bla*<sub>CTX-M</sub> were determined relative to the

233 endogenous control gene *rpsL* (36) using the  $\Delta$ Ct method. qPCR and qRT-PCR primers and  
234 probes are provided in **Table S2**.

235

### 236 **Serial passaging experiments on clinical *E. coli* ST131 index bacteremia isolate**

237 p4A passaging experiments with antibiotic selection were performed in LB broth under shaking

238 conditions at 37°C. A single colony from the index strain of patient 4 (p4A) was grown

239 overnight, then diluted 1:100 into fresh LB containing ertapenem (ETP) (Sigma-Aldrich) at 0.5

240 MIC ETP. The process was repeated with increasing concentrations of ETP until growth was

241 observed at an ETP concentration of 32  $\mu$ g/mL. Passaging experiments were performed twice

242 with growth occurring at an ETP MIC of  $\geq$  32  $\mu$ g/mL within 3 passages (i.e. 72 hours) on each

243 occasion. For the first passaging experiment, cells were collected on four consecutive days

244 (strains p4A\_1 to p4A\_4) while continuing to passage at an ETP concentration of 32  $\mu$ g/mL.

245 This was done in order to determine whether progressive  $\beta$ -lactamase encoding gene

246 amplification would be observed. On the second set of passaging experiments, cells were

247 collected on the first day that the ETP MIC reached  $\geq$  32  $\mu$ g/mL, serially diluted onto agar plates,

248 and two different isolates were studied to assess for heterogeneity (strains p4A\_H1 and

249 p4A\_H2). Additional serial passaging experiments were conducted using p4C and p4D isolates

250 in the absence of antibiotic selection to determine the stability of the amplified units with

251 protocol adapted from previously published methods (37).

252

### 253 **$\beta$ -lactamase cloning and expression analysis**

254 The open reading frames of  $\beta$ -lactamases were amplified from genomic DNA of the *K.*

255 *pneumoniae* strain MB101 using Q5 polymerase and the primers listed in **Table S2**. Cloned

256 ORFs were inserted into the arabinose inducible vector pBAD33 by Gibson assembly (38) of  
257 purified products. pBAD33 $bla_{CTX-M-15}$  and pBAD33 $bla_{OXA-1}$  were transformed into DH5 $\alpha$  *E. coli*  
258 and were maintained with 50  $\mu$ g/mL chloramphenicol in cation adjusted Mueller Hinton (MHII)  
259 media. MIC assays were performed with ceftriaxone (Sandoz GmbH), or piperacillin-tazobactam  
260 (Fresenius Kabi USA) as follows. DH5 $\alpha$  strains carrying pBAD33 $bla_{CTX-M-15}$ , pBAD33 $bla_{OXA-1}$ ,  
261 or control vector were grown for 18 hours at 220 rpm at 37°C in MHII with 50  $\mu$ g/mL  
262 chloramphenicol. These cultures were diluted to approximately 5x10<sup>5</sup> CFU/mL in MHII with  
263 0.2% L-Arabinose or vehicle control, without chloramphenicol. Each strain was exposed to serial  
264 dilutions of the above drugs in microtiter plates sealed with gas-permeable membranes (Midsco).  
265 Microtiter plates were incubated for 18 hours at 220 rpm at 37°C, followed by OD<sub>600</sub>  
266 measurement in a Biotek Synergy HT plate reader. The lowest tested antibiotic concentration  
267 yielding OD<sub>600</sub> measurement of 0.06 or less in at least two of three replicate wells was  
268 considered to be the MIC.

269

## 270 **Statistical analyses**

271 All statistical analyses were performed using Stata v13.1 (StataCorp LP, College Station, TX).  
272 Bivariate comparisons between patients with recurrent bacteremia and patients with a single  
273 bacteremia episode were made with the Wilcoxon Rank-sum test and Fisher's exact test as  
274 appropriate based on covariate distributions. Comparisons of DNA and RNA levels among  
275 strains was performed using the Kruskal-Wallis test when more than two strains were analyzed  
276 or the Wilcoxon Rank-sum test when two strains were analyzed. MIC comparisons were  
277 performed using ANOVA with Dunnett's test of multiple comparisons. Statistical significance  
278 was assigned as a two-sided *P* value < 0.05.

279

## 280 **Data availability**

281 The index isolate assemblies from recurrent bacteremia patients that developed non-CP-CRE as  
282 well as the long-read and short-read data for all isolates have been deposited in the National  
283 Center for Biotechnology (NCBI) BioProject database PRJNA603908. ONT-sequencing data of  
284 non-CP-CRE isolates from a previous study (18) were deposited in NCBI BioProject database  
285 PRJNA388450. All other data analyzed during this study are available in the supplemental  
286 materials and/or available upon request from the corresponding author.

287

## 288 **RESULTS**

### 289 **116 patients with ESBL-E bacteremia were identified from the University of Texas MD** 290 **Anderson Cancer Center (MDACC) from January 2015 to July 2016**

291 Clinical and demographic features are presented on **Table S3**. *E. coli* was the most common  
292 organism isolated (100/116; 86.2%), followed by *K. pneumoniae* (14/116; 12.1%), and *K.*  
293 *oxytoca* (2/116; 1.7%). Carbapenems were used as primary treatment in 92% of index cases.  
294 Recurrent bacteremia was identified in 16/116 (13.8%) patients and primarily occurred either in  
295 patients with leukemia or recipients of hematopoietic stem cell transplants (14/16 cases, **Table**  
296 **S3**). The majority (14/16) of recurrent bacteremia cases had *E. coli* isolated, with the remaining  
297 two cases being due to *K. pneumoniae* infections. Carbapenem-resistant isolates were present in  
298 4/16 (25%) recurrent bacteremia patients (**Fig. 1**). All four recurrent isolates that developed  
299 carbapenem resistance were *E. coli* isolates from leukemia patients. The full set of serial isolates  
300 was available for 11/16 (68.8%) patients, including all strains from the four patients that had at  
301 least one recurrent isolate that developed a carbapenem resistant phenotype.

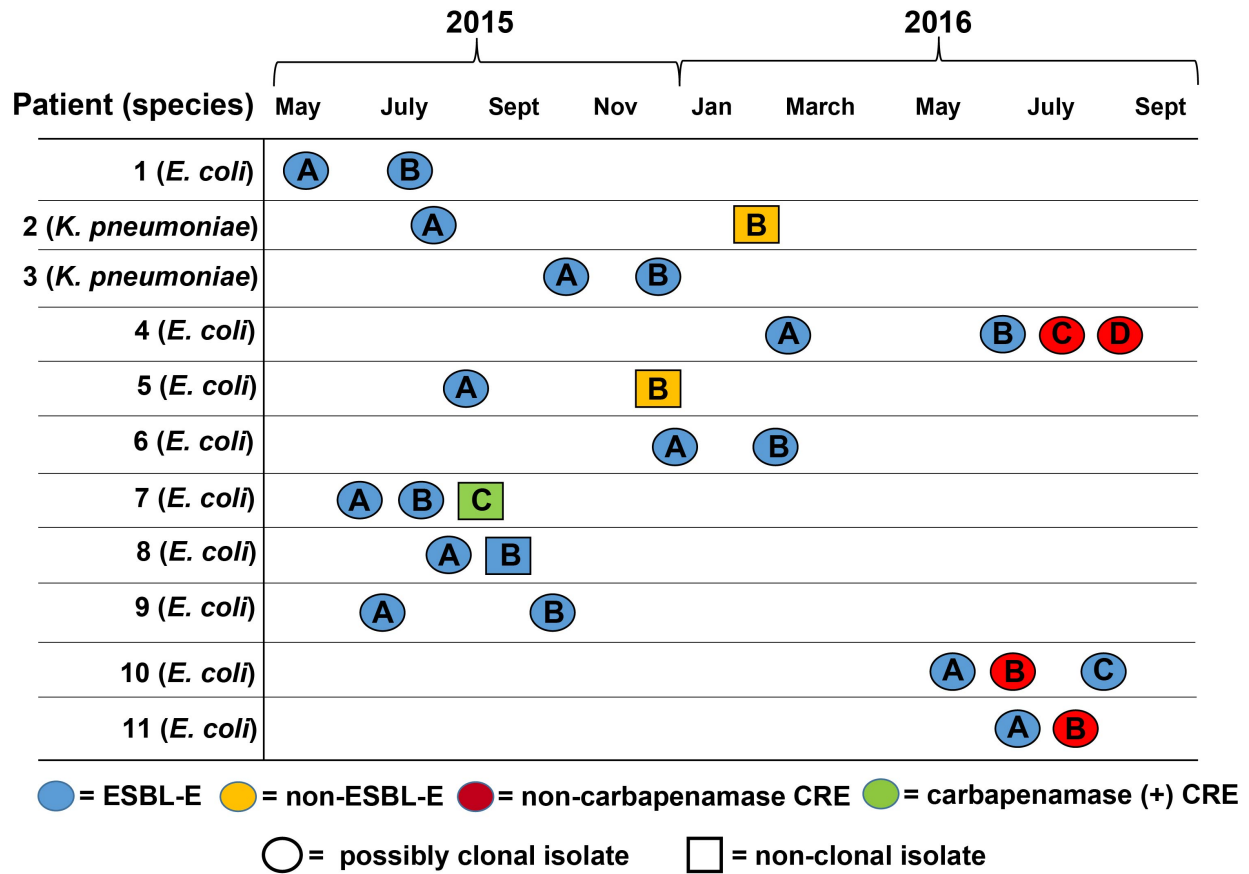

302

303 **FIG 1** Overview of strains using Illumina short-read data. Timeline showing date of serial  
 304 isolation from blood cultures. Patient numbers are in the first column. The shape and color of the  
 305 isolates as labelled in the legend indicate clonality and antimicrobial resistance respectively.  
 306 Strains were considered possibly clonal if they were the same sequence type and clustered on the  
 307 phylogenetic tree. Patient subgroups (e.g. Patient 1; isolate A and B) refers to the order of  
 308 isolation. Abbreviations are as follows: ESBL-E = extended spectrum  $\beta$ -lactamase producing  
 309 *Enterobacteriales*, CRE = carbapenem resistant *Enterobacteriales*.

310

311

312 **Detection of non-CP-CRE emergence from three sets of clonal, ESBL-E recurrent**  
313 **bacteremia isolates**

314 The 11 sets of patient serial isolates included nine *E. coli* serial isolates and two *K. pneumoniae*  
315 serial isolates. We performed Illumina short-read sequencing on the 26 strains identified from the  
316 11 sets of serial isolates. Strain details are provided in **Table S4**. Serial strain relatedness was  
317 assessed using phylogenetic analysis with strains considered possibly clonal if they were the  
318 same sequence type, had the same Bayesian population structure, and clustered together on the  
319 phylogenetic tree (**Fig. S1**). The temporal collection, antimicrobial resistance, and strain  
320 relatedness are depicted in **Fig. 1**. Only a single strain, the 3<sup>rd</sup> isolate from patient 7, which we  
321 will abbreviate as p7C, had a carbapenemase based on a positive Neo-Rapid CARB Kit Test  
322 result (**Fig. 1**). Whole genome, short-read sequencing analysis confirmed the presence of the  
323 class D carbapenemase, *bla*<sub>OXA-181</sub> in p7C. Furthermore, p7C was a different sequence type from  
324 the patient 7 index strain (p7A) indicating new strain acquisition.

325  
326 We focused our subsequent analyses on the isolates from patient 4 (p4), patient 10 (p10), and  
327 patient 11 (p11), as each had at least one carbapenem resistant recurring non-CP-CRE isolate.  
328 Our HiSeq WGS data indicated that all three patients had recurrent *E. coli* isolates that  
329 respectively clustered together within a core genome phylogenetic tree, had the same Bayesian  
330 hierarchical population structure, and belonged to the same sequence type (**Fig. S1**). We  
331 confirmed clonality by measuring pairwise SNP distances between each recurrent isolate and  
332 their respective index strain using their highly resolved, ONT consensus assemblies. Our analysis  
333 indicated that there were less than 20 SNPs for all respective recurrent strains relative to their



334 index strain suggesting that these three patients had clonal, re-infecting strains that had  
335 developed carbapenem resistance through a non-carbapenemase mechanism (**Table 1**).

336

**Table 1. Clonality, Antibiotic Minimum Inhibitory Concentration (MIC), Outer Membrane Protein, and  $\beta$ -lactamase Characterization of *Enterobacteriales* Isolates**

| Patient    | Isolate | ST  | Species              | Pairwise SNP Distance | CAZ MIC <sub>a</sub> | CEP MIC <sub>a</sub> | TZP MIC <sub>a</sub> | ETP MIC <sub>a</sub> | MEM MIC <sub>a</sub> | <i>ompC</i> <sup>b,d</sup>   | <i>ompF</i> <sup>c,d</sup> | ESBL Amplification                                              |
|------------|---------|-----|----------------------|-----------------------|----------------------|----------------------|----------------------|----------------------|----------------------|------------------------------|----------------------------|-----------------------------------------------------------------|
| patient 4  | p4A     | 131 | <i>E. coli</i>       | Ref                   | 16                   | ≥64                  | 8                    | ≤0.5                 | ≤0.25                | WT                           | WT                         | None                                                            |
|            | p4B     | 131 | <i>E. coli</i>       | 2                     | 16                   | 8                    | ≥128                 | ≤0.5                 | ≤0.25                | WT                           | WT                         | <i>bla</i> <sub>OXA-1</sub>                                     |
|            | p4C     | 131 | <i>E. coli</i>       | 14                    | 16                   | 64                   | ≥128                 | ≥32                  | 4                    | c.504_505ins <sup>e</sup>    | c.548delA                  | <i>bla</i> <sub>OXA-1</sub>                                     |
|            | p4D     | 131 | <i>E. coli</i>       | 15                    | ≥64                  | ≥64                  | ≥128                 | ≥32                  | 4                    | c.504_505ins <sup>e</sup>    | c.548delA                  | <i>bla</i> <sub>OXA-1</sub>                                     |
| patient 10 | p10A    | 10  | <i>E. coli</i>       | Ref                   | 16                   | 2                    | 8                    | ≤0.5                 | ≤0.25                | WT                           | WT                         | None                                                            |
|            | p10B    | 10  | <i>E. coli</i>       | 1                     | ≥64                  | ≥64                  | ≥128                 | ≥32                  | 8                    | c.634_649del                 | c.77_87del                 | <i>bla</i> <sub>CTX-M-55</sub>                                  |
|            | p10C    | 10  | <i>E. coli</i>       | 0                     | ≥64                  | ≥64                  | 16                   | ≤0.5                 | ≤0.25                | WT                           | WT                         | <i>bla</i> <sub>CTX-M-55</sub>                                  |
| patient 11 | p11A    | 131 | <i>E. coli</i>       | Ref                   | ≥64                  | ≥64                  | 64                   | ≤0.5                 | ≤0.5                 | c.508_521delins <sup>f</sup> | c.305_312del               | <i>bla</i> <sub>OXA-1</sub> ,<br><i>bla</i> <sub>CTX-M-15</sub> |
|            | p11B    | 131 | <i>E. coli</i>       | 0                     | ≥64                  | ≥64                  | ≥128                 | 4                    | 1                    | c.508_518del                 | c.305_312del               | <i>bla</i> <sub>OXA-1</sub> ,<br><i>bla</i> <sub>CTX-M-15</sub> |
| NA         | MB101   | 37  | <i>K. pneumoniae</i> | NA                    | ≥64                  | ≥64                  | ≥128                 | ≥32                  | 8                    | c.607_626ins <sup>e</sup>    | NA                         | <i>bla</i> <sub>OXA-1</sub> ,<br><i>bla</i> <sub>CTX-M-15</sub> |
| NA         | MB746   | 405 | <i>E. coli</i>       | NA                    | 64                   | ≥64                  | ≥128                 | ≥32                  | 4                    | c.131insA                    | c.760_763ins               | <i>bla</i> <sub>OXA-1</sub> ,<br><i>bla</i> <sub>CTX-M-15</sub> |

338 <sup>a</sup>All minimum inhibitory concentrations (MICs) reported in  $\mu$ g/ml; abbreviations for each antibiotic are as follows: CAZ

339 (ceftazidime), CEP (cefepime), TZP (piperacillin-tazobactam), ETP (ertapenem), MEM (meropenem)

340 <sup>b</sup>Uniprot reference entry names for *ompC* are A0A192C9D6\_ECOLX, OMPC\_ECOLI, and U9Y7F2\_ECOLX for ST131, ST10, and

341 ST405 *E. coli* isolates respectively; MB101 porin is *ompK36* with Uniprot reference entry name A0A0H3H0Y2\_KLEPH

342 <sup>c</sup>Uniprot reference entry names for *ompF* are A0A192CJUO\_ECOLX, OMPF\_ECOLI, and S0Z171\_ECOLX for ST131, ST10, and

343 ST405 *E. coli* isolates respectively

344

345 <sup>d</sup>WT indicates ‘wild type’ coding DNA sequence, ‘ins’ indicates insertion, ‘del’ indicates deletion, and ‘delins’ indicates

346 insertion/deletion; all indel events are frame-shift mutations that leave premature, truncated coding DNA sequences unless otherwise

347 noted.

348 <sup>e</sup>Insertion of MB1860TU\_A with variable number of repeating units

349 <sup>f</sup>INDEL, Y170\_N174delinsKR, creates an in-frame OmpC protein

350 <sup>e</sup>Insertion of 1X copy of MB101TPU

351

352

353 **Gene amplification and porin loss associated with emergence of non-CP-CRE**

354 Each of the serial isolates that developed a non-CP-CRE phenotype (p4A-D, p10A-C, and p11A-  
355 B) had increased Illumina short-read and ONT long-read coverage depth for  $\beta$ -lactamase  
356 encoding genes indicating amplification (**Fig. 2, Table S5 and Table S6**). Specifically, we noted  
357 increased coverage depth of *bla*<sub>OXA-1</sub> in all p4 recurrent isolates, *bla*<sub>CTX-M-55</sub> in p10 recurrent  
358 isolates, and *bla*<sub>OXA-1</sub> and *bla*<sub>CTX-M-15</sub> in both the index and recurrent isolate of p11 (**Table 1**). We  
359 used qPCR to confirm the increased short-read and long-read coverage depth of our WGS  
360 analyses and found that the increased coverage depth corresponded to increased transcript levels  
361 of the amplified  $\beta$ -lactamase encoding genes (**Fig. 2**).

362

363 We further characterized outer membrane porin genes with our sequencing data as disruptions of  
364 these genes are often correlated with carbapenem resistance. The only consistently identified  
365 variation in the non-CP-CRE strains relative to their ESBL-E index strains were mutations that  
366 disrupted the ORFs of the porin proteins OmpC and OmpF (**Table 1**). The initial sequencing  
367 results indicated that an insertion sequence (IS) as well as nucleotide deletions that resulted in  
368 frame-shifts mediated *ompC* gene disruption in isolates that developed non-CP-CRE.

369 Conversely, we consistently found frame-shift inducing deletions in *ompF* genes for both the  
370 carbapenem susceptible and resistant isolates (**Table 1**). For p10 isolates, interruption of OmpC  
371 and OmpF in the second, non-CP-CRE isolate (p10B) was followed by reversion to the WT  
372 OmpC and OmpF genes in the third, carbapenem-susceptible isolate (p10C).

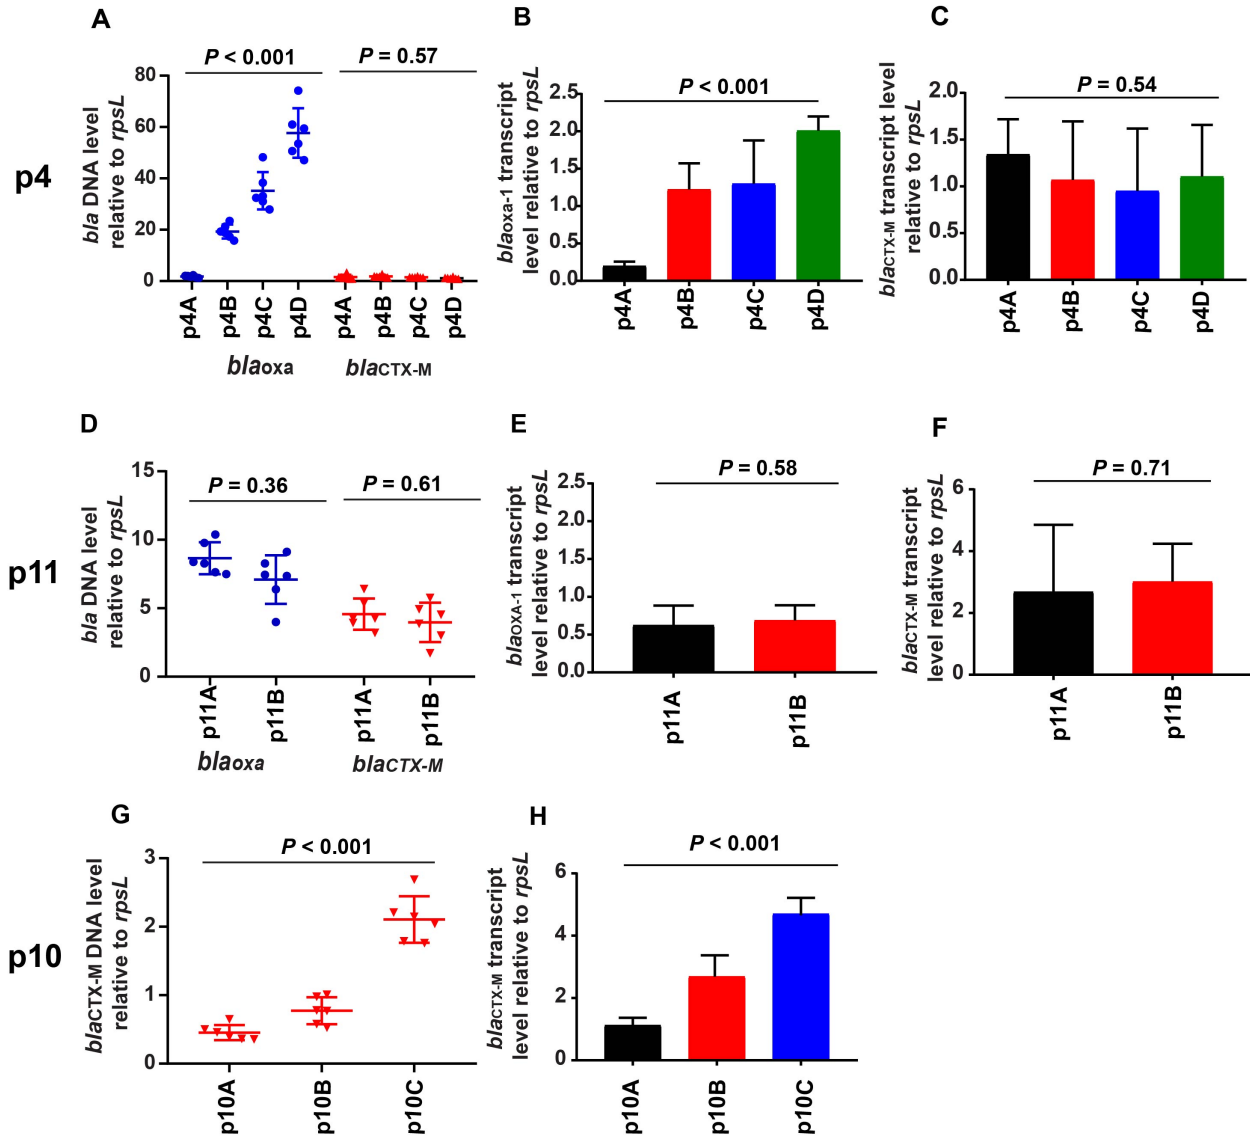

373

374 **FIG 2** PCR analysis of  $\beta$ -lactamase encoding gene levels and transcript levels. Rows from top to

375 bottom are data from patient 4 (p4), patient 11 (p11), and patient 10 (p10). (A, D, G) Taq-Man

376 qPCR of genomic DNA results collected in triplicate on two separate days ( $n = 6$ ) for either

377 *bla*<sub>OXA-1</sub> (blue) or *bla*<sub>CTX-M</sub> (red) relative to the endogenous control gene *rpsL*. Data shown are

378 individual data points with mean  $\pm$  SD superimposed. (B, E, H) *bla*<sub>OXA-1</sub> transcript level relative

379 to endogenous control gene *rpsL*. RNA was collected from mid-exponential phase in triplicate on

380 two separate days ( $n = 6$ ). Data shown are mean  $\pm$  SD. (C, F) similar analysis to (B, E, H) except

381 that data are for *bla*<sub>CTX-M</sub>. Note that the p10 strains do not contain *bla*<sub>OXA-1</sub>.  $P$  values refer to

382 measurements in the serial isolates relative to initial isolate using the Kruskal-Wallis (p4 and  
383 p10) or Wilcoxon rank-sum tests (p11).

384

385 **Class 1 transposon TnMB1860 found in both ST131 p4 and p11 serial isolates.**

386 The consensus ONT assembly index strains for patient 4 (p4A) and patient 11 (p11A) both  
387 contain an 8,147 bp, IS26-mediated translocatable unit (TU), designated as MB1860TU\_A,  
388 which carries *bla*<sub>OXA-1</sub>, and inserts upstream adjacent to another 3,985 bp TU, designated  
389 MB1860TU\_B, that carries *bla*<sub>CTX-M-15</sub> (**Fig. 3A**). MB1860TU\_C is the combination of both  
390 respective TUs that is 12,132 bp in length. The entire putative class 1 transposon structure  
391 designated TnMB1860 is 12,952 bp (**Fig. 3A**).

392

393 When moving from the 5' to 3' end of TnMB1860 using the p4A chromosome (**Fig. 3A**;  
394 GenBank Accession #: CP049085) as the reference, the first resistance island contains two  
395 flanking IS26 *tnpA* genes in opposite orientation with the aminoglycoside N6'-acetyltransferase  
396 variant gene (*aac(6')-Ib-cr*), the oxacillinase gene (*bla*<sub>OXA-1</sub>), and a truncated chloramphenicol  
397 resistance determinant (*ΔcatB3*). Following the second IS26 element in TnMB1860, there is an  
398 aminoglycoside N3'-acetyltransferase III variant gene, *aacC3*, and the tunicamycin resistance  
399 gene, *tmrB*. Downstream of the *tmrB* gene is an IS3 element, which has a modified left inverted  
400 repeat (IR<sub>L</sub>) and a frame-shifted transposase that has been truncated by a third IS26 element at  
401 the 3' end of the IS3 transposase. Immediately downstream of this IS26 element is a truncated  
402 Tn2-like transposase which marks the 3' boundary of MB1860TU\_A. MB1860TU\_A is inserted  
403 adjacent to the smaller translocatable unit, MB1860TU\_B, which includes another fragment of a  
404 Tn2-like transposase, as well as *orf477*, *bla*<sub>CTX-M-15</sub>, and an *ISEcpI* truncated by an intact IS26,

405 which marks the 3' boundary of both MB1860TU\_B, as well as serves as the 3' flanking IS26  
406 element for the full length TnMB1860. Similar IS26/Tn2 family transposable elements that have  
407 putatively formed via homologous recombination events have previously been reported in  
408 association with IS26-mediated AMR transfer in *Enterobacteriales* (6, 39, 40).  
409  
410 TnMB1860 is located on the p4 chromosome (1,764,660 – 1,777,611 bp; GenBank Accession #:  
411 CP049085) and the p11 chromosome (1,812,524 – 1,825,475 bp; GenBank Accession #:  
412 CP049077). One of the signatures of transposition are variable sized direct repeats called target  
413 site duplications (TSDs) that flank insertion sequences and are created during the transposition  
414 process (41-43). The TnMB1860 composite transposon on the p11A chromosome has 7-bp TSDs  
415 that indicate a transposition within a 3,762 bp ORF that putatively is involved in molybdopterin  
416 cofactor biosynthesis (**Fig. S2**). Interestingly, p4A differs in chromosomal context relative to  
417 p11A due to an intramolecular transposition event that occurred in reverse orientation (**Fig. S3**).  
418 This is evidenced by the fact that p4A has an approximately 61 kbp region that is inverted with a  
419 downstream IS26 in inverse orientation that has an 8-bp TSD within the colicin I receptor gene,  
420 *cirA*, in reverse complement orientation (**Fig. S3**). An alignment of p4A and p11A with two  
421 other *E. coli* ST131 chromosomes, TO217 (GenBank Accession #: LS992192.1) and  
422 Ecol\_AZ146 (GenBank Accession #: CP018991.1) indicate similar chromosomal carriage of  
423 TnMB1860 with the noted inversion event that has occurred in the p4A isolate (**Fig. S3**).  
424

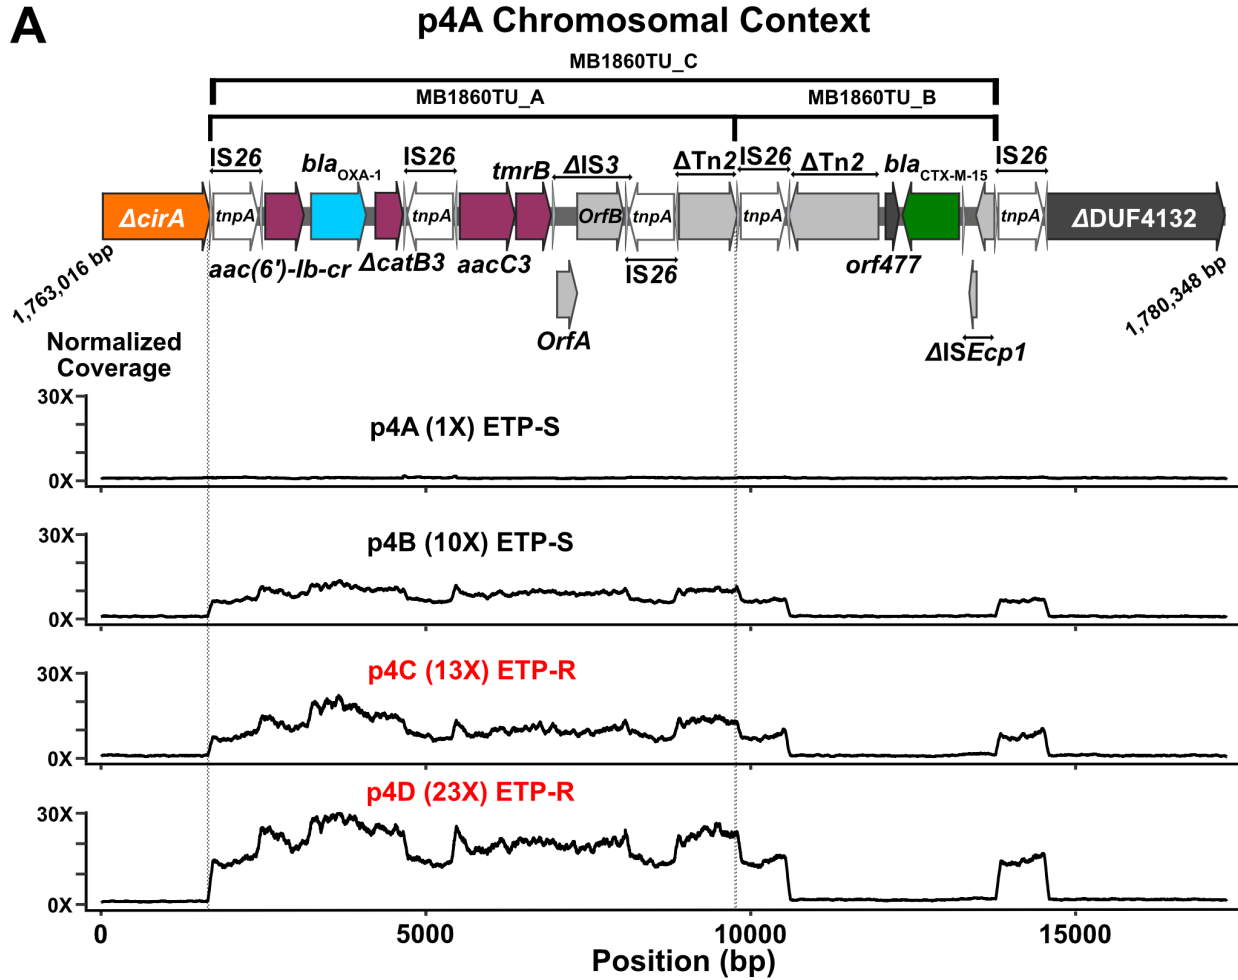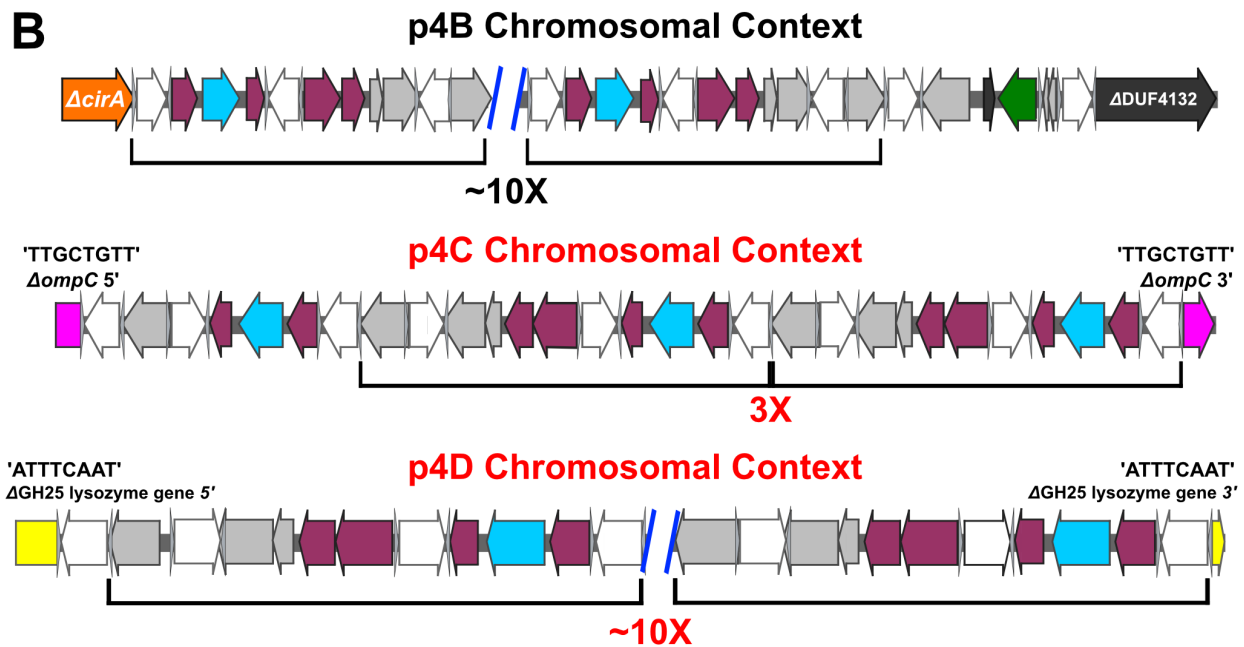



426 **FIG 3** Characterization of IS26-flanked composite transposon with amplification and  
427 transposition of modular translocatable units in patient 4 serial isolates (i.e., p4A – p4D).  
428 Terminal left and right inverted repeats (IR<sub>L</sub> and IR<sub>R</sub> respectively) of insertion sequences (ISs)  
429 are specified by grey triangles that bracket respective complete and incomplete *tnpA* genes.  
430 ORFs are colored as follows: non-β-lactam AMR encoding genes (maroon), *bla*<sub>OXA-1</sub> (blue),  
431 *bla*<sub>CTX-M-15</sub> (green), IS26 *tnpA* (white), and other IS/Tn elements (gray). (A) Schematic indicates  
432 chromosomal context (1,763,016 – 1,780,348 bp; GenBank Accession #: CP049085) of  
433 TnMB1860 locus flanked by directly oriented IS26 transposases found in p4A isolate.  
434 Immediately below schematic are normalized, short-read coverage depth line graphs for the four  
435 p4 serial isolates with MB1860TU\_A bracketed by dotted lines. ‘ETP-S’ = ertapenem  
436 susceptible; ‘ETP-R’ = ertapenem resistant. Font color for each serial isolate labelled in  
437 normalized coverage graph representing carbapenem susceptibility (black) or carbapenem  
438 resistance (red). (B) Characterization of amplification, transposition, and ORF disruption events  
439 in each of the respective patient 4 recurrent episode isolates. Black brackets beneath ORFs  
440 indicate MB168TU\_A. The p4B chromosomal context shows a ~10X MB1860TU\_A  
441 amplification event in the original p4A locus. The p4C chromosomal context additionally  
442 contains transposition and disruption of the *ompC* porin gene (pink) ~63 kbp upstream of  
443 original p4A TnMB1860 locus with subsequent amplification. p4D isolate has previous  
444 amplification and transposition events found in p4B and p4C as well as another MB1860TU\_A  
445 transposition and disruption of a putative glycoside hydrolase gene (i.e. GH25; yellow) ~71 kbp  
446 downstream of TnMB1860 locus with an amplification. The target site duplications (TSDs)  
447 created by the transposition of the TU are indicated above each respective junction site that flank  
448 the insertion and disruption of the *OmpC* and GH25 genes respectively.  
449

450 **Delineation of MB1860TU\_A amplification and transposition in ST131 p4 and p11 serial**  
451 **isolates**

452 Patient 11 isolates p11A and p11B had relatively the same increase in mapping coverage for both  
453 *bla*<sub>OXA-1</sub> and *bla*<sub>CTX-M-15</sub> (**Table S3**). The consensus assemblies of both p11 isolates revealed that  
454 this increase in relative short-read coverage was due to two copies of *bla*<sub>OXA-1</sub> and *bla*<sub>CTX-M-15</sub>  
455 being present on a chromosomally located Tn*MB1860* as well as on IS26-mediated genomic  
456 resistant modules present on a 180,963bp multireplicon, F-type plasmid, p11A\_p2 (**Fig. S2, Fig.**  
457 **S3**; GenBank Accession #: CP049079). The CRE phenotype of p11B relative to p11A appears to  
458 be driven by additional inactivation of the *ompC* gene given that the *ompF* gene is truncated in  
459 both strains (**Table 1**).

460  
461 In contrast to the p11 isolates, the amplification and transposition of the modular, translocatable  
462 units that compose Tn*MB1860* in p4 was completely in a chromosomal context (**Fig. 3**). There  
463 was a consistent increase in short-read coverage depth (**Fig. 3A**) of the entire MB1860TU\_A  
464 structure up to approximately 23-fold in p4D relative to the seven housekeeping pubMLST genes  
465 for ST131. We first analyzed strain p4B, which had developed resistance to piperacillin-  
466 tazobactam (TZP) but remained carbapenem susceptible (**Table 1**). In p4B, MB1860TU\_A  
467 generated a ~10X tandem array *in situ* most likely through a conservative, IS26-mediated  
468 transposition mechanism or homologous recombination (**Fig. 3B**) (44, 45). We were unable to  
469 assemble the full-length tandem array due to limitations in read length size. However, we were  
470 able to use the SVAnts tool to identify thirty individual reads with two or greater number of  
471 tandem arrays of MB1860TU\_A with 7 individual reads having 4X copies of *bla*<sub>OXA-1</sub>. The  
472 occurrence of the 10X TU amplification at the original Tn*MB1860* locus was confirmed by

473 aligning the p4B long-reads to the reference chromosome p4A using SVAnts in conjunction with  
474 a short-read pileup analysis. Additionally, all outer membrane protein genes were WT and  
475 remained intact with p4B. Given that p4B had developed resistance to TZP relative to p4A  
476 (**Table 1**), we sought to determine whether overexpression of *bla*<sub>OXA-1</sub> could drive TZP  
477 resistance. Inducing *bla*<sub>OXA-1</sub> expression through cloning under an arabinose responsive promoter  
478 increased TZP MIC 6.8-fold relative to uninduced cells (**Fig. S4**).

479  
480 Next, we examined the non-CP-CRE serial strains p4C and p4D. Interestingly, in both p4C and  
481 p4D a transposition and insertion of MB1860TU\_A into *ompC* was present approximately 63  
482 kbp upstream of the original *TnMB1860* chromosomal locus (**Fig. 3B**). This *ompC* gene  
483 disruption was confirmed through the identification of multiple p4C long-reads > 30 kbp that  
484 covered the full transposition site as well as identifying this insertion on the p4C and p4D  
485 incomplete chromosomal assemblies. We found two individual long reads that were able to span  
486 the full length of the MB1860TU\_A array (3X copies) which disrupts *ompC* for p4C and  
487 confirmed the exact MB1860TU insertion location within *ompC* (c.504\_505ins; **Table 1**). We  
488 also were able to identify 8-bp TSDs ('5-TTGCTGTT-3') at each end of the *ompC* insertion  
489 sites, which indicates MB1860TU\_A replicative transposition. The p4D assembly and individual  
490 long-reads indicated a second MB1860TU\_A transposition and insertion ~67 kbp downstream of  
491 the *TnMB1860* within a GH25 lysozyme gene (**Fig. 3B**). This transposition event could be  
492 confirmed by 8-bp TSDs (5'-TTGCTGTT-3') flanking the full insertion site (**Fig 3B**). A  
493 progressive increase in both DNA and RNA levels for *bla*<sub>OXA-1</sub> but not *bla*<sub>CTX-M-15</sub> in the p4 serial  
494 isolates was confirmed using qPCR and qRT-PCR, respectively (**Fig. 2A-C**).

495

496 **Serial passage of patient 4 index strain with ETP elicits *bla*<sub>OXA-1</sub> and *bla*<sub>CTX-M-15</sub>**  
 497 **amplification through unique translocatable units relative to *in vivo* recurrent strains**  
 498 We passaged strain p4A in increasing concentration of ertapenem (ETP) to determine whether  
 499 antimicrobial exposure was driving the genetic changes observed in our serial clinical isolates.  
 500 Resistance to ETP developed within three passages corresponding to three days, upon which we  
 501 collected strains for the next four days (p4A\_1- p4A\_4). Short-read and qPCR analyses  
 502 demonstrated all four isolates had amplification of both *bla*<sub>OXA-1</sub> and *bla*<sub>CTX-M-15</sub> relative to the  
 503 p4A index strain prior to ETP exposure (**Fig 4**). ONT sequencing on all four isolates indicated  
 504 that similar to p4B, there was *in situ* amplification occurring at the original TnMB1680  
 505 chromosomal locus. However, the full-length TU, MB1860TU\_C, which consists of  
 506 MB1860TU\_A and MB1860TU\_B (**Fig 4A**) that harbor *bla*<sub>OXA-1</sub> and *bla*<sub>CTX-M-15</sub> respectively,  
 507 was the amplifying structure for the passaged isolates in contrast to what we saw in the *in vivo*  
 508 isolates where MB1860TU\_A was the sole amplifying structure (**Table 2**).

**Table 2. p4A Serial Passaging Characterization**

| Sample | ETP MIC (µg/ml) | <i>ompC</i>                                                                 | <i>ompF</i>      | <i>bla</i> <sub>OXA-1</sub> copy # <sup>a</sup> | <i>bla</i> <sub>CTX-M-15</sub> copy # <sup>a</sup> |
|--------|-----------------|-----------------------------------------------------------------------------|------------------|-------------------------------------------------|----------------------------------------------------|
| p4A_1  | ≥ 32            | c.208T>C; p.Q70X                                                            | c.17_18insIS1A   | 6                                               | 7                                                  |
| P4A_2  | ≥ 32            | c.208T>C; p.Q70X                                                            | WT               | 8                                               | 9                                                  |
| P4A_3  | ≥ 32            | c.208T>C; p.Q70X                                                            | c.62_63insIS1A   | 6                                               | 7                                                  |
| P4A_4  | ≥ 32            | c.208T>C; p.Q70X                                                            | c.517_518insIS1A | 6                                               | 7                                                  |
| p4A_H1 | ≥ 32            | IS1A variant mediated insertion 96 bp upstream of +1 <i>ompC</i> start site | WT               | 1                                               | 9                                                  |
| p4A_H2 | ≥ 32            | IS1A variant mediated insertion 96 bp upstream of +1 <i>ompC</i> start site | WT               | 1                                               | 17                                                 |

509 <sup>a</sup>See Materials and Methods for Calculation

510

511 We repeated the experiment and again found that ETP resistance developed within three  
 512 passages from the p4A isolate. ONT sequencing of the 2<sup>nd</sup> round of passaged isolates (p4A\_H1  
 513 and p4A\_H2) revealed amplification of MB1860TU\_B that harbors *bla*<sub>CTX-M-15</sub> solely, which we

514 verified using qPCR (**Fig. 4**). Similar to what we observed *in vivo*, the serially passaged ETP  
515 resistant isolates contained inactivating mutations in *ompC* although we did not observe any  
516 MB1860TU mediated interruptions (**Table 2**). INDELS inactivating the *ompF* gene were  
517 observed in a fraction of the serial isolates suggesting *ompF* inactivation may not be necessary  
518 for the development of non-CP-CRE (**Table 2**). We found that p4A responded *in vitro* to ETP  
519 similarly to what was observed in our serial clinical isolates by amplification of modular  
520 MB1860TU elements with concomitant porin disruption. Nevertheless, there was differential  
521 amplification of IS26 translocatable units demonstrating the modularity of these MGEs.

522

523 In order to determine the chromosomal stability of the MB1860TU tandem arrays in the absence  
524 of antibiotic selective pressure, both ertapenem resistant (ETP-R) strains p4C and p4D were  
525 passaged for 10 days (~60 generations) without supplemented ertapenem. Both ETP-R recurrent  
526 strains consistently maintained carbapenem resistance through 60 generations of growth (**Fig.**  
527 **S5**). The p4C and p4D strains had relative copy number decreases of *bla*<sub>OXA-1</sub> from 33 to 18X  
528 (45% decrease) and 53 to 42X (21% decrease) respectively (**Fig. S5**). These results indicate that  
529 both adapted strains can have persisting carbapenem resistance with associated tandem arrays of  
530 amplified *bla*<sub>OXA-1</sub> maintained in the absence of antibiotic exposure.

531

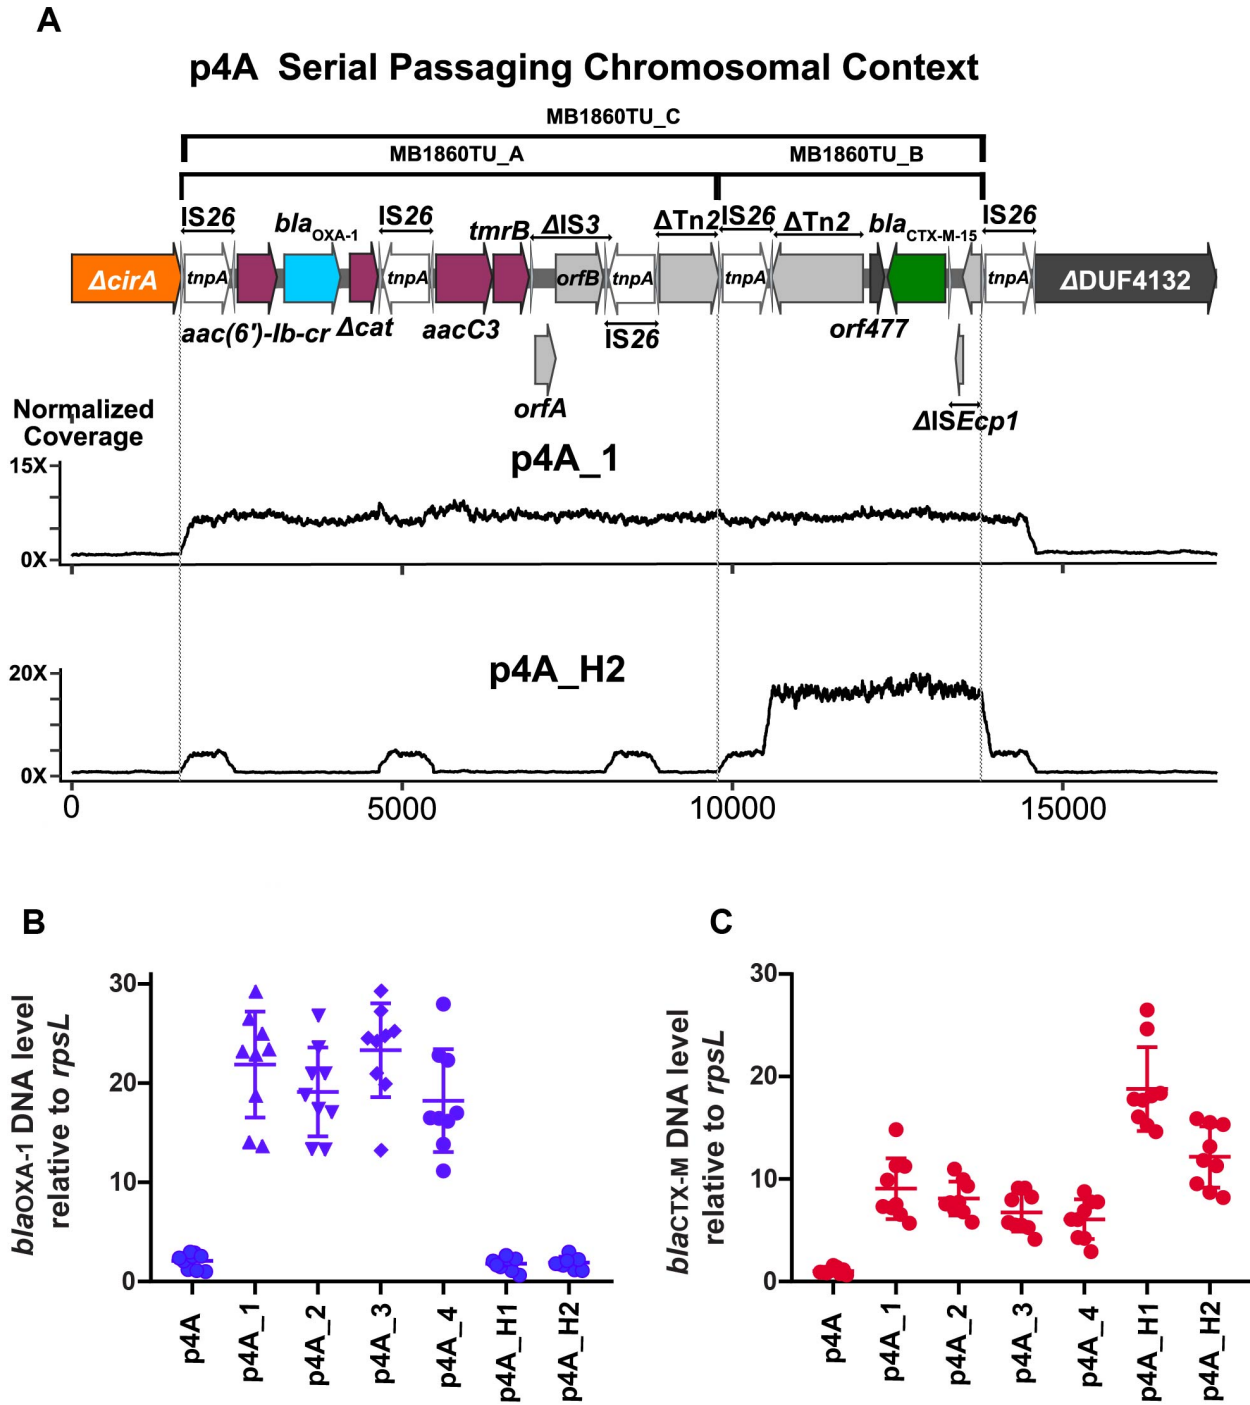

532

533 **FIG 4** Identification and characterization of  $\beta$ -lactamase gene amplification following p4A serial  
 534 passaging under ertapenem (ETP) exposure. Strain p4A was grown in ETP with isolates p4A\_1-  
 535 4 collected during the 1<sup>st</sup> round of passaging and p4A\_H1 and p4A\_H2 collected during the 2<sup>nd</sup>  
 536 round. (A) Schematic of TnMB1860 locus from p4A as detailed in FIG 2. Immediately below

537 the schematic are normalized, short-read coverage depth line graphs for p4A\_1 and p4A\_H2  
538 aligned to p4A with location of MB1860TU\_A and MB1860TU\_B bracketed by dotted lines.  
539 Note amplification of MB1860 TU\_C in strain p4A\_1 whereas only MB1860TU\_B amplified in  
540 strain p4A\_H2. (B) and (C) are Taq-Man qPCR of genomic DNA collected in triplicate on two  
541 separate days (n = 6) for either *bla*<sub>OXA-1</sub> (B) or *bla*<sub>CTX-M</sub> (C) relative to the endogenous control  
542 gene *rpsL*. Data shown are individual data points with mean ± SD superimposed.

543

544 **Unique *ISEcpI*-mediated plasmid transposition of *bla*<sub>CTX-M-55</sub> in patient 10 serial ST10 *E.***

545 ***coli* isolates** Compared to the p4 and p11 strains, the serial isolates from patient 10 (p10A –  
546 p10C) contain a different MGE that putatively drives the amplification of the ESBL encoding  
547 gene, *bla*<sub>CTX-M-55</sub>. Index strain p10A harbors *bla*<sub>CTX-M-55</sub> located on an *ISEcpI* transposition unit  
548 designated EC215TPU that resides on a multireplicon FIB-FIC-FII plasmid (**Fig. 5; GenBank**  
549 **Accession #: CP049082**). ‘Transposition unit’ (TPU) is used here to distinguish from  
550 translocatable unit (TU) as they have different transposition mechanisms that are mediated by  
551 *ISEcpI* and IS26 respectively. There are three additional small plasmids present in p10A, one of  
552 which is a ColeE1-like 6.8 kbp plasmid designated as p10A\_p2 (GenBank Accession #:  
553 CP049083), that is highly comparable to pCERC1 (GenBank Accession #: JN012467) (46).

554

555 EC215TPU translocates from the multireplicon, type F plasmid in p10A, designated p10A\_p1, to  
556 p10A\_p2 in the second serial isolate p10B (**Fig. 5B**). The *ISEcpI*-mediated transposition can be  
557 identified and confirmed by the 5-bp TSDs that are immediately upstream of the *ISEcpI* 14 bp  
558 IRL and downstream of another alternative, 14 bp right inverted repeat (IRRalt) respectively (41,  
559 42, 47). There are TSDs flanking EC215TPU at the p10A\_p2 recombination site with both the

560 IR<sub>L</sub> and IR<sub>Ralt</sub> represented as a blue triangle (5'-CCTCACACCTTCGA-3') on **Fig. 5B**.  
561 Notably, as the entire insertion region with three *bla*<sub>CTX-M-55</sub> copies on p10B has 5 bp TSDs (5'-  
562 GATAT-3') that flank IR<sub>L</sub> and IR<sub>Ralt</sub> respectively, one can postulate that an amplification event  
563 occurred on p10A\_p1, which then subsequently inserted into p10A\_p2 (**Fig. 5B**). p10B is also  
564 the only carbapenem-resistant p10 serial isolate. This likely is due in part to deletions in *ompC*  
565 and *ompF* that create frame-shift truncations of each respective porin in contrast to the WT  
566 genotypes of each respective porin found in p10A and p10C. When analyzing the third isolate  
567 p10C, there only is one copy of *bla*<sub>CTX-M-55</sub> identified in the assembly and short-reads on  
568 p10A\_p2. However, the short-read and long-read coverage depth analysis suggests an increase in  
569 copy number (**Table S6**). The subsequent increase in initiation RNA genes, a marker for ColE1-  
570 like plasmids with *bla*<sub>CTX-M-55</sub> suggests that p10C amplification occurs by an increase in the  
571 overall copy number of p10A\_p2. These data are consistent with our qPCR analysis which  
572 demonstrate progressively higher DNA levels of *bla*<sub>CTX-M-55</sub> for each serial isolate (**Fig. 2**).  
573



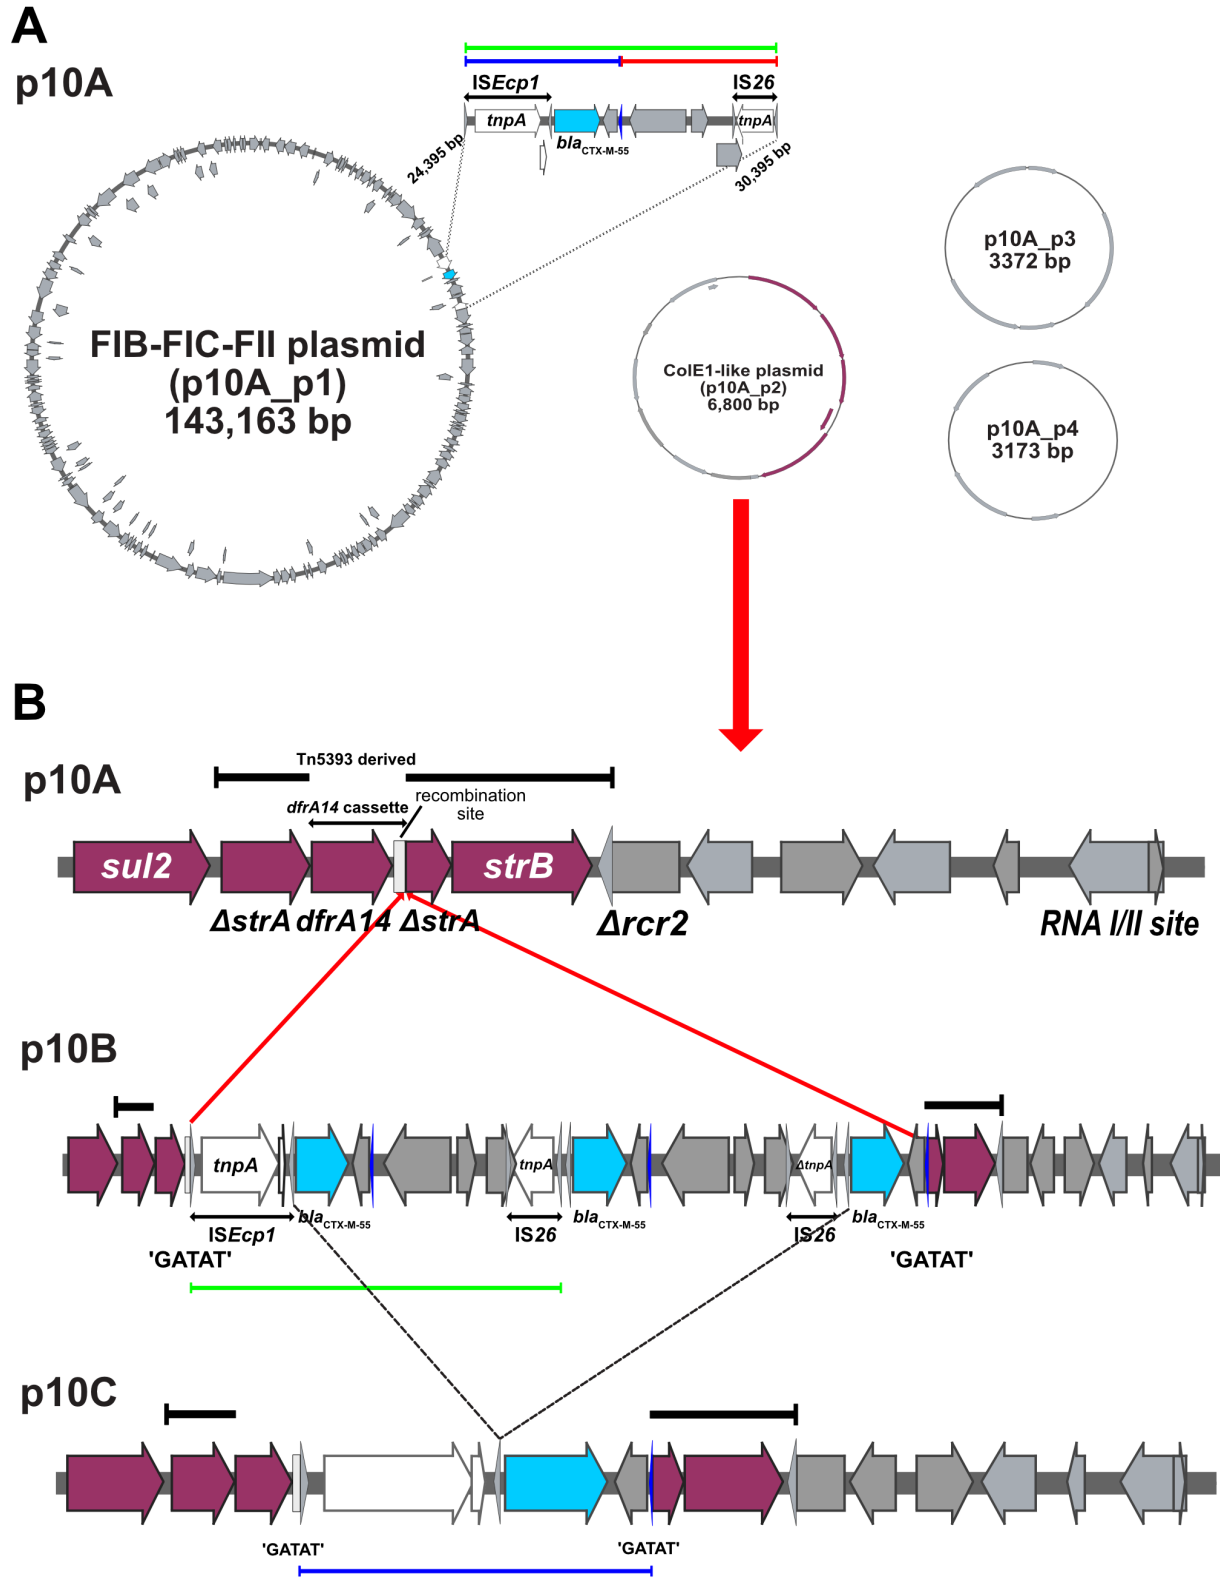

575 **FIG 5** Genomic analysis of *ISEcpI*-mediated mobilization of *bla*<sub>CTX-M-55</sub> from a multireplicon F  
576 type plasmid (GenBank Accession #: CP049082) to a ColE1-like, high copy number plasmid  
577 (GenBank Accession #: CP049083) in p10 isolates. (A) Non-chromosomal genomic context for  
578 patient 10 index strain (p10A) harboring four circular plasmid structures. The *bla*<sub>CTX-M-55</sub> gene is  
579 located on a 143,163 bp FIB-FIC-FII plasmid (p10A\_p1) on an *ISEcpI*-*bla*<sub>CTX-M-55</sub>-IS26 5945  
580 bp transposition unit (TPU) indicated by a green bracket. The blue and red regions are the union  
581 of this green bracketed region and represent regions highlighted in the following section. (B)  
582 Progression of TPU insertion into ColE1-like plasmid (p10A\_p2). p10A illustrates the full  
583 genome context of p10A\_p2 including the *sul2-ΔstrA-dfrA14-ΔstrA-strB* resistance island. The  
584 top black, bracketed region indicates genome that is derived from the Tn5393 transposon. The  
585 region indicated by double-ended arrows indicates where the *dfrA14* cassette inserted itself into  
586 Tn5393. The box downstream of *dfrA14* indicates the *attC* recombination site. p10B shows the  
587 amplified TPU (11,939 bp) insertion into the p10A\_p2 recombination site (indicated by red  
588 arrows). The region is bracketed by 5-bp TSDs (5'-GATAT-3') indicative of *ISEcpI* mediated  
589 transposition. An alternative, right inverted repeat (IRRalt) is indicated by blue triangle. p10C  
590 contains an 8,998 bp deletion (black dotted lines) where two copies of *bla*<sub>CTX-M-55</sub> are dropped.  
591 This creates a TPU flanked by the IRL and IRRalt of *ISEcpI* (blue bracket).

592

### 593 **Detection of β-lactamase gene amplification and porin disruption by AMR elements in non-** 594 **serial *Enterobacteriales* strains**

595 There were two non-CP-CRE strains, MB101 (*K. pneumoniae*) and MB746 (*E. coli*), identified  
596 in a previous study examining the role of short-read WGS in predicting β-lactam resistance  
597 (**Table 1**) (18). We performed ONT sequencing on the two isolates to determine whether

598 mechanisms of gene amplification and porin disruption were similar to what was observed in the  
599 cohort of non-CP-CRE bacteremia serial isolates. Both isolates contain IS26-mediated TUs  
600 carrying *bla*<sub>OXA-1</sub> as previously characterized in TnMB1860 (**Fig. 6**).

601  
602 For strain MB101 (**Fig. 6A-B**), a ST37 *K. pneumoniae* isolate, the ~9310 bp IS26-mediated TU,  
603 designated MB101TU harbors *aac*-(6')-*Ib-cr*, *bla*<sub>OXA-1</sub>,  $\Delta$ *catB3*, *aacC3*, and *tmrB* and is nearly  
604 identical (100% coverage; 99.9% ID) to MB1860TU\_A found in serial *E. coli* isolates from  
605 patients 4 and 11 (**Fig. 6A**). An ISEcpI-mediated TPU harboring *bla*<sub>CTX-M-15</sub>, designated  
606 MB101TPU, was also present on the MB101 chromosome as well as an FIB<sub>K</sub> type plasmid, with  
607 at least five copies present on the chromosome based on the Flye assembly and individual long  
608 reads. The assembly and long reads indicate the transposition of MB101TPU into a putative  
609 glycoporin encoding gene which was followed by the transposition of MB101TU to an existing  
610 IS26 element downstream of MB101TPU (**Fig. 6A**). We identified an amplification of  
611 MB101TU at this locus that created a tandem array of at least 8X copies based on the  
612 identification of multiple long-reads with multiple MB101TU copies. Interestingly, there was  
613 also a transposition event of MB101TPU into the *ompK36* encoding gene, a homolog of *ompC* in  
614 *E. coli* (**Fig. 6B**). Thus, MB101 has amplification of both *bla*<sub>OXA-1</sub> and *bla*<sub>CTX-M-15</sub> via distinct  
615 mechanisms along with TPU mediated porin disruption.

616  
617 The ST405 *E. coli* isolate, MB746, has an IS26-mediated translocatable unit, designated  
618 MB746TU, which also includes a genomic resistance module that carries *aac*-(6')-*Ib-cr*, *bla*<sub>OXA-1</sub>,  
619 and a truncated chloramphenicol resistance determinant (**Fig. 6C-D**) similar to what is seen on  
620 MB1860TU\_A. MB746TU carries an additional tetracycline resistance operon and macrolide

621 resistance operon, not present on TnMB1860. We found four individual long-reads that carried at  
622 least 3X copies of MB746TU present in the same MB746 chromosomal location (**Fig. 6C**).

623 Additionally, we identified a FIB plasmid that harbored both *bla*<sub>OXA-1</sub> and *bla*<sub>CTX-M-15</sub> which has a  
624 similar configuration and orientation to TnMB1860 (Red bracket; **Fig. 6D**). The IS26-mediated  
625 TU carrying *bla*<sub>CTX-M-15</sub> has 99.7% BLAST identity with MB1860\_B with the only substantial  
626 difference being a size of 5558 bp vs the 3985 bp MB1860TU\_B (**Fig. 6D**). Notably, MB746  
627 also had *ompC* and *ompF* gene disruptions (**Table 1**) comparable to what was observed in serial  
628 isolates that developed non-CP-CRE phenotypes with concomitant  $\beta$ -lactamase amplifications.

629 These data show that there are multiple, non-CP-CRE clinical isolates within our region that  
630 have amplification and transposition of similar IS26 and *ISEcpI*-mediated elements that harbor  
631  $\beta$ -lactamase genes encoding genes in conjunction with porin disruption.

632

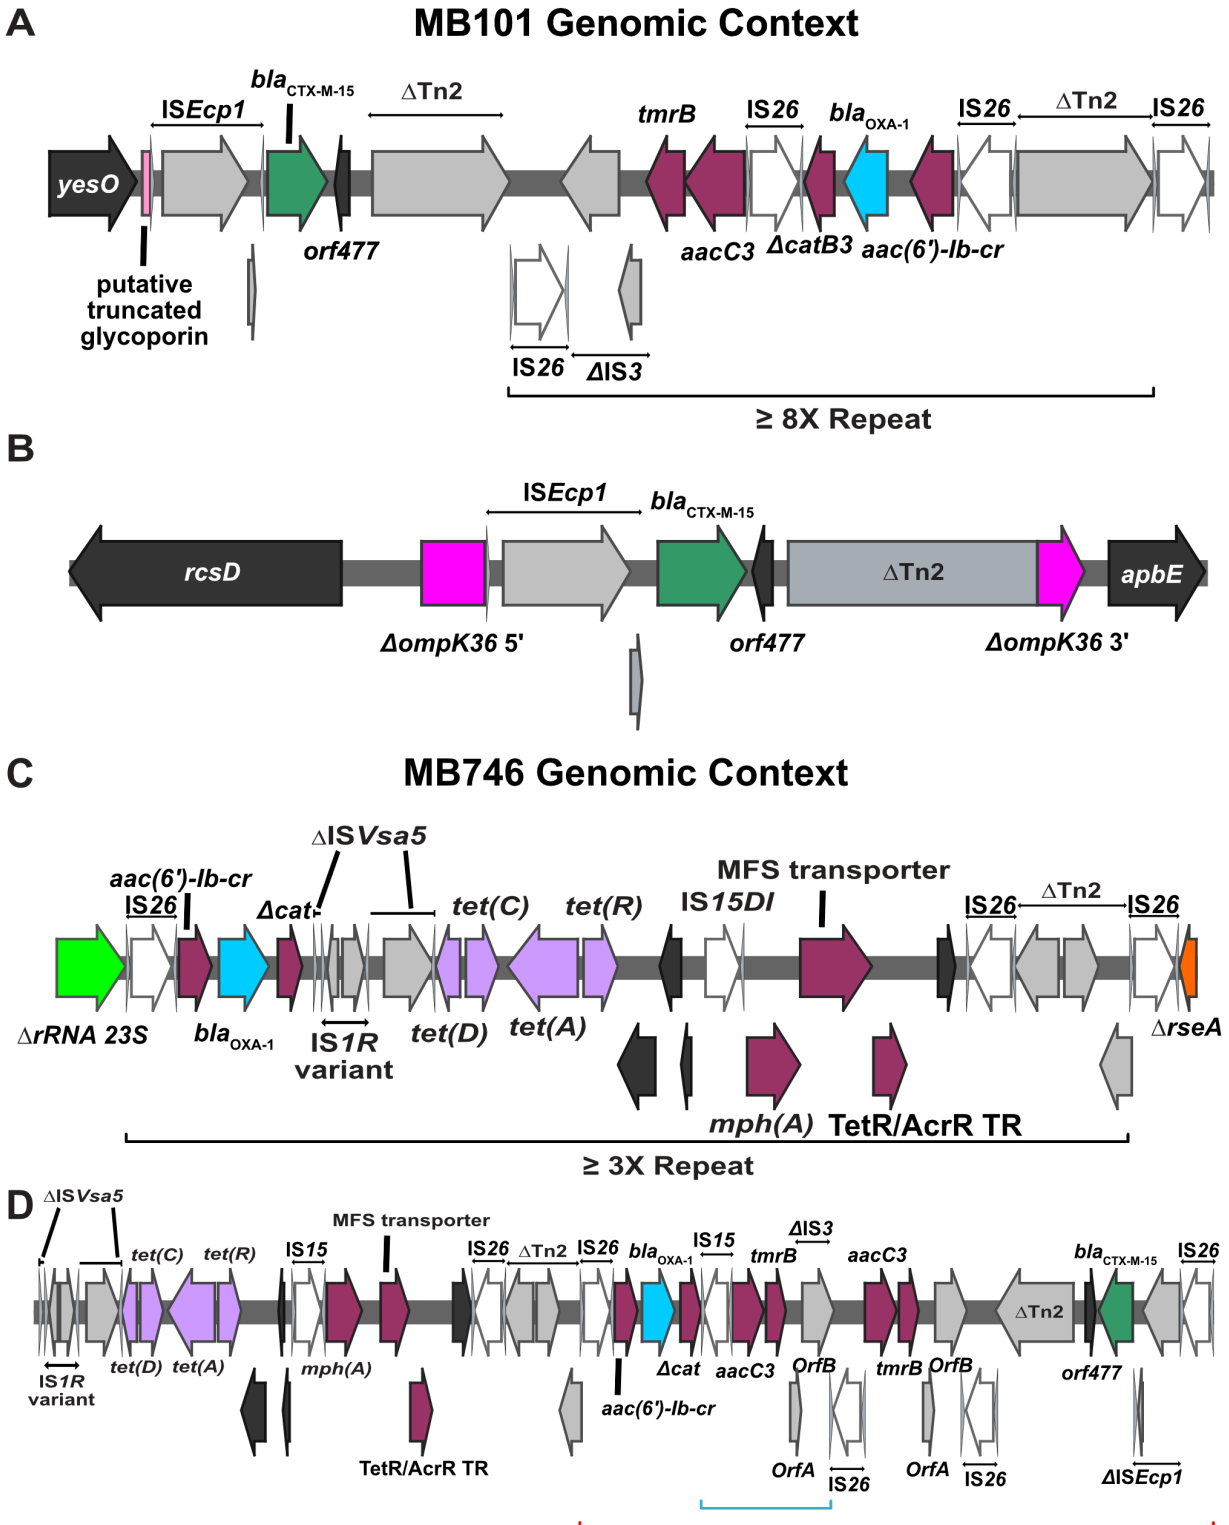

633

634 **FIG 6** Genomic context of end-stage MB101 and MB746 isolates respectively. Terminal left and

635 right inverted repeats (IR<sub>L</sub> and IR<sub>R</sub> respectively) of insertion sequences (ISs) are specified by

636 grey triangles that bracket respective complete and incomplete *tnpA* genes. ORFs are colored as  
637 follows: AMR genes (maroon), *bla*<sub>OXA-1</sub> (blue), *bla*<sub>CTX-M-15</sub> (green), IS26 *tnpA* (white), and other  
638 IS/Tn elements (gray). Delta ( $\Delta$ ) next to annotated genetic region indicates a truncation or  
639 disruption (A-B) Chromosomal locations of MB101TU (Fig. 6A) and MB101TPU (Fig. 6B)  
640 indicating respective amplification and transposition of each element. ~8X MB101TU repeat  
641 indicated by black bracket. Truncated *ompK36* gene labelled in pink (Fig. 6B). (C-D) Genomic  
642 context of MB746TU and respective genomic resistance modules carrying AMR genes. Black  
643 brackets beneath Fig. 6C schematic indicate repeating MB101TU unit. Fig. 6D indicates FIB  
644 plasmid carriage of genomic resistance modules. Red bracket indicates IS26 transposon structure  
645 that shares 100% coverage; 99% BLAST similarity with TnMB1860. Blue bracket indicates  
646 small, 2X repeat structure.

647

## 648 **DISCUSSION**

649 While recent systematic surveillance studies indicate that the prevalence of non-CP-CRE  
650 remains high (3, 4), the mechanisms contributing to non-CP-CRE emergence within clinical  
651 settings are largely unknown. This public health issue is particularly troublesome given the  
652 difficulties in properly diagnosing non-CP-CRE infections and prescribing effective  
653 antimicrobials due to the transient nature of their carbapenem resistance phenotypes as well as  
654 their lack of a carbapenemase. This analysis demonstrates that multiple TU- and TPU-mediated  
655 modular amplifications of  $\beta$ -lactamase encoding genes in conjunction with porin inactivation are  
656 driving non-CP-CRE emergence in our cohort of cancer patients with recurrent bacteremia . It is  
657 well established that “copy-in” replicative transposition is a common mechanism by which IS26-  
658 mediated TUs mobilize to regions lacking a pre-existing IS26 element (43, 45, 48). Recent

659 studies have shown that TUs can create tandem resistance gene arrays by targeting genomes with  
660 an existing copy of IS26 through an intermolecular, conservative transposition mechanism and,  
661 less frequently, through RecA-dependent homologous recombination (43-45, 49). We were able  
662 to determine that the initial incorporation of the composite transposon TnMB1860 as well as  
663 MB1860TU\_A transposition into *ompC* and the predicted glycoside hydrolase gene occurred  
664 through a replicative transposition mechanism based on characteristic TSDs at insertion sites.  
665 The amplification of MB1860TU\_A, MB1860TU\_B, and MB1860TU\_C that created tandem  
666 arrays of resistance genes observed in our study likely occurred through a conservative  
667 transposition mechanism although RecA-dependent homologous recombination could also be  
668 contributing to the generation of these tandem arrays. The ability to detect genetic structures  
669 capable of amplifying  $\beta$ -lactamase encoding genes that synergistically insert into porin encoding  
670 genes will be essential for diagnostic and surveillance purposes in order to ensure we are  
671 properly identifying clinical isolates that have the ability to develop CRE.

672  
673 Amplification of *bla*<sub>OXA-1</sub> in both serial and non-serial isolates consistently included *aac*-(6')-Ib-  
674 *cr* and  $\Delta$ *catB3* in association with other modular, IS26-mediated translocatable units carrying  
675 resistance genes. Livermore et al. recently observed the co-occurrence of *aac*-(6')-Ib' and  
676 *bla*<sub>OXA-1</sub> in 147/149 *E. coli* strains, primarily ST131 isolates, suggesting that many *E. coli*  
677 isolates carrying *bla*<sub>OXA-1</sub> may be capable of this amplification (40, 50). The finding that *bla*<sub>OXA-1</sub>  
678 amplification was consistently associated with progressive development of  $\beta$ -lactam resistance  
679 was somewhat surprising given that this enzyme is typically considered a narrow spectrum  $\beta$ -  
680 lactamase (51). However, overexpression of *bla*<sub>OXA-1</sub> using an arabinose inducing promoter was  
681 shown to generate resistance to ertapenem in a porin deficient strain (6). This study, along with

682 our own results, indicates that *bla*<sub>OXA-1</sub> likely contains sufficient carbapenem hydrolysis activity  
683 to generate resistance with the combination of augmented gene copy number and decreased  
684 carbapenem concentration due to porin inactivation. Additionally, we demonstrate that  
685 overexpression of *bla*<sub>OXA-1</sub> without porin inactivation produced TZP resistance, a finding that  
686 could help resolve previously noted discrepancies between  $\beta$ -lactamase gene content and TZP  
687 susceptibility (18, 52). Similar amplifications of the narrow-spectrum, TEM  $\beta$ -lactamases have  
688 also been shown to be associated with TZP resistance, suggesting amplification of narrow-  
689 spectrum  $\beta$ -lactamases may be a substantial mechanism contributing to TZP resistance (9-11).

690  
691 The other amplified  $\beta$ -lactamase in our cohort was *bla*<sub>CTX-M</sub>. CTX-M is the most commonly  
692 identified ESBL enzyme in *Enterobacterales* (53) and high level CTX-M production has  
693 previously been shown to confer carbapenem resistance in porin-deficient *E. coli* (6) as well as  
694 *K. pneumoniae* (54). Amplification of MB1860TU\_B harboring *bla*<sub>CTX-M-15</sub> with concomitant  
695 porin disruption was associated with development of ETP resistance in one of our two passaging  
696 experiments, demonstrating the versatility of various modules of TnMB1860 in responding to  
697 carbapenem exposure. Unlike *bla*<sub>OXA-1</sub>, we did not identify *bla*<sub>CTX-M</sub> genes in association with  
698 other AMR encoding elements, but rather *bla*<sub>CTX-M</sub> genes were consistently present with an  
699 *ISEcpI* element, which has been previously described for *E. coli* (55, 56). The array of  
700 mechanisms by which *bla*<sub>CTX-M</sub> copy numbers could increase included (1) *in situ* IS26-mediated  
701 amplification of MB1860TU\_B (strain P4A\_H1) and MB1860TU\_C (strain p4A1 – p4A4); (2)  
702 *ISEcpI*-mediated transposition of EC215TPU from a low-copy, F-type plasmid to a multi-copy,  
703 ColE1-like plasmid (strain p10B); (3) and multiple chromosomal *ISEcpI*-mediated transposition  
704 unit insertions including into the *ompK36* porin encoding gene (strain MB101). Thus, the various



705 *bla*<sub>CTX-M</sub> amplification mechanisms suggest that augmentation of *bla*<sub>CTX-M</sub> copy number may be a  
706 major driver of non-CP-CRE development.

707

708 Along with permitting direct visualization of genomic resistance module amplifications  
709 containing various  $\beta$ -lactamase genes, ONT sequencing also allowed for identifying porin-  
710 mediated disruption by TU and TPU structures. Laboratory studies that generated CRE strains  
711 through serial passaging have consistently found that OmpC and OmpF porin production is  
712 reduced in carbapenem resistant isolates, but mechanisms have generally involved alterations in  
713 the porin regulatory protein OmpR or in OmpR binding sites (6, 7). Similarly, a recent study of a  
714 single patient with recurrent *E. coli* infection identified a single amino acid change in OmpR as  
715 leading to loss of OmpC and OmpF expression with development of ertapenem resistance (15).  
716 Conversely, we observed direct inactivation of OmpC and OmpF either through TU/TPU  
717 transposition into their respective ORFs or through INDELS that resulted in frame-shift  
718 mutations whereas no alterations in OmpR were identified in our cohort. To our knowledge,  
719 there have been only two other reports of an *ISEcpI*-mediated TPU harboring a  $\beta$ -lactamase  
720 encoding gene causing the disruption of a porin, in both cases OmpK35 from *K. pneumoniae* (57,  
721 58). While there have been a number of studies that have implicated IS-mediated porin  
722 disruptions, including IS26 mediated disruptions (54, 59-61), to our knowledge, this is the first  
723 documented IS26-mediated translocatable unit disruption of an outer membrane porin followed  
724 by amplification of a  $\beta$ -lactamase gene. Given the length of the TUs, as well as the fact that they  
725 have the ability to amplify and create tandem arrays once inserted into the porin encoding genes,  
726 it is unlikely that targeted PCR based strategies or commonly used short-read approaches alone  
727 would have been able to identify the full extent of the TUs observed in our study. Thus,

728 performing long read sequencing on larger cohorts of *Enterobacterales* with porin deficient  
729 backgrounds should reveal whether TU/TPUs harboring AMR genes are a frequent mediator of  
730 porin gene disruption, but have not been previously identified due to the long and repetitive  
731 nature of the involved DNA structures.

732

733 The clinical impact of  $\beta$ -lactamase gene amplification and porin loss driving carbapenem  
734 resistance has been postulated to be mitigated by the fitness costs imposed on the organism by  
735 such genetic changes (37, 62-64). However, such AMR mechanisms are increasingly being  
736 recognized as commonly occurring in clinical isolates, including in the serious infections  
737 described in our cohort (37, 62-64). This would suggest that organisms with the capability to  
738 amplify AMR genes are widespread and capable of causing significant human infections  
739 especially under antibiotic selective pressure (7, 9, 10, 65). Moreover, the most recent systematic  
740 data on CRE in the U.S. found no difference in outcomes between patients with CRE and non-  
741 CP-CRE suggesting that circulating non-CP-CRE organisms may not have significant fitness  
742 defects (4). Furthermore, our own results from serial passaging p4C and p4D without ETP  
743 exposure suggests these amplified structures harboring AMR genes associated with increased  
744 MICs to ertapenem and meropenem may be fairly stable in the absence of antibiotic selective  
745 pressure. The chromosomal context of *TnMB1860* may provide insights into the stability of this  
746 structure as a previous study had noted stable transposon carriage when mobilized from plasmid  
747 to chromosome at very low levels of antibiotic exposure (66).

748

749 In addition to possibly imposing a fitness cost on the organism, AMR gene amplifications have  
750 also been associated with the presence of antimicrobial heteroresistance (65, 67). The interplay

751 between AMR gene amplification, heteroresistance and fitness is likely reflected in the genotype  
752 changes of patient 10 isolates given the development and subsequent reversion of porin  
753 mutations observed in those strains (Table 1). Recent systematic surveys have indicated  
754 approximately 25% of strains reported as carbapenem resistant tested as susceptible at a central  
755 laboratory, likely reflecting the transient phenomenon of AMR heteroresistance (4, 64). A  
756 limitation of our study is that we only sequenced a single colony for each isolate, which almost  
757 certainly underestimates the genetic complexity of a bacterial population responding to  
758 antimicrobial therapy. Nevertheless, a challenge presents itself in capturing population  
759 heterogeneity with a single genome assembly as multiple, heterogeneous sequencing reads will  
760 break current assembler algorithms.

761

## 762 **CONCLUSIONS**

763 We have used serial, clinical isolates subjected to complementary WGS approaches to identify  
764 that a combination of porin inactivation and IS-mediated amplification of TU and TPU elements  
765 harboring  $\beta$ -lactamase encoding genes underlies the emergence of non-CP-CRE from ESBL-E  
766 parental isolates within our study population. We predict that more widespread application of  
767 long-read sequencing technologies will facilitate appreciation of the mechanisms and impact of  
768 TU- and TPU-mediated transpositions, porin disruptions, and gene amplifications on a diverse  
769 array of AMR pathogens in the clinical setting.

770

## 771 **LIST OF ABBREVIATIONS**

772 non-carbapenemase-producing carbapenem resistant *Enterobacterales* = non-CP-CRE;  
773 translocatable unit = TU; transposition unit = TPU

774

775 **DECLARATIONS**

776 **Ethics approval and consent to participate:** A waiver of informed consent to collect clinical  
777 data from electronic medical records and analyze the isolates was provided by the MDACC IRB  
778 (PA15-0799). A waiver of consent from UTHealth Science Center at Houston (IRB #: HSC-  
779 SPH-20-0032) was obtained to perform bacterial genomics sequencing and analysis.

780

781 **Consent for publication:** Not applicable

782

783 **Availability of data and materials:** The index isolate assemblies from recurrent bacteremia  
784 patients that developed non-CP-CRE as well as the long-read and short-read data for all isolates  
785 have been deposited in the National Center for Biotechnology (NCBI) BioProject database  
786 PRJNA603908. ONT-sequencing data of non-CP-CRE isolates from a previous study (18) were  
787 deposited in NCBI BioProject database PRJNA388450. All other data analyzed during this study  
788 are available in the supplemental materials and/or available upon request from the corresponding  
789 author.

790

791 **Competing interests:** The authors declare that they have no competing interests

792

793 **Funding:** Financial support for this study was provided by the Shelby Foundation (R. Lee Clark  
794 Fellow Award to SAS). Sequencing was performed at the MDACC DNA sequencing facility  
795 which is supported by the National Cancer Institute [grant number P30-CA016672 via the  
796 Bioinformatics Shared Resource].

797 JK is supported by the Cancer Prevention and Research Institute of Texas (RP150596). Other  
798 support provided by the UT Southwestern DocStars award (DEG, JK). JGP is supported by the  
799 NIAID (1K01AI143881-01). CAA is supported by NIH/NIAID grants K24AI121296,  
800 R01AI134637, R21AI143229, UTHealth Presidential Award, University of Texas System  
801 STARS Award, and Texas Medical Center Health Policy Institute Funding Program.

802

803 **Author contributions:** WCS developed the database, generated and analyzed the data, and was  
804 a major contributor to the writing of the manuscript. SLA designed the study, collected and  
805 analyzed the data, and significant contributor to writing the manuscript. RP helped designed the  
806 study, performed the experiments, and analyzed the data. JK performed experiments and  
807 analyzed the data. MB performed the experiments and contributed to writing the paper. XL  
808 helped perform phylogenomic analyses. AK helped perform phylogenomic analyses and  
809 contributed to writing the paper. JGP contributed to the design of the study, analyzed the isolates,  
810 and writing of the paper. PS collected and curated the isolates. CAA helped design the study,  
811 analyze the data, and writing of the paper. DEG analyzed the data and contributed to the writing  
812 of the paper. BMH wrote scripts to analyze the data, analyzed the data, and contributed to  
813 writing the paper. SAS designed the study, analyzed the data, and major contributor to the  
814 writing of the manuscript. All authors read and approved the final manuscript.

815

816 **Acknowledgements:** We thank the personnel of the clinical microbiology laboratory at MD  
817 Anderson Cancer Center for assistance with collecting isolates. Would also like to thank Jennifer  
818 Walker, PhD for her insightful input in drafting the manuscript.

819

820 **REFERENCES**

821

- 822 1. CDC. Antibiotic Resistance Threats in the United States, 2019. Atlanta, GA: U.S.  
823 Department of Health and Human Services, CDC; 2019.
- 824 2. Logan LK, Weinstein RA. The Epidemiology of Carbapenem-Resistant  
825 Enterobacteriaceae: The Impact and Evolution of a Global Menace. *J Infect Dis.*  
826 2017;215(suppl\_1):S28-S36.
- 827 3. Guh AY, Bulens SN, Mu Y, Jacob JT, Reno J, Scott J, et al. Epidemiology of  
828 Carbapenem-Resistant Enterobacteriaceae in 7 US Communities, 2012-2013. *JAMA.*  
829 2015;314(14):1479-87.
- 830 4. Duin Dv, Arias C, Komarow L, Chen L, Hanson B, Weston G, et al. Molecular and  
831 Clinical Epidemiology of Carbapenem-Resistant Enterobacteriaceae in the United States: a  
832 Prospective Cohort Study. *Lancet ID.* 2020.
- 833 5. Tangden T, Adler M, Cars O, Sandegren L, Lowdin E. Frequent emergence of porin-  
834 deficient subpopulations with reduced carbapenem susceptibility in ESBL-producing *Escherichia*  
835 *coli* during exposure to ertapenem in an in vitro pharmacokinetic model. *J Antimicrob*  
836 *Chemother.* 2013;68(6):1319-26.
- 837 6. Adler M, Anjum M, Andersson DI, Sandegren L. Influence of acquired beta-lactamases  
838 on the evolution of spontaneous carbapenem resistance in *Escherichia coli*. *J Antimicrob*  
839 *Chemother.* 2013;68(1):51-9.
- 840 7. van Boxtel R, Wattel, A. A., Arenas, J., Goessens, W. H., & Tommassen, J. Acquisition  
841 of Carbapenem Resistance by Plasmid-Encoded-AmpC-Expressing *Escherichia coli*.  
842 *Antimicrobial agents and chemotherapy.* 2017;61(1):e01413-16.
- 843 8. Beceiro A, Maharjan S, Gaulton T, Doumith M, Soares NC, Dhanji H, et al. False  
844 extended-spectrum {beta}-lactamase phenotype in clinical isolates of *Escherichia coli* associated  
845 with increased expression of OXA-1 or TEM-1 penicillinases and loss of porins. *J Antimicrob*  
846 *Chemother.* 2011;66(9):2006-10.
- 847 9. Schechter LM, Creely DP, Garner CD, Shortridge D, Nguyen H, Chen L, et al. Extensive  
848 Gene Amplification as a Mechanism for Piperacillin-Tazobactam Resistance in *Escherichia coli*.  
849 *MBio.* 2018;9(2).
- 850 10. Rodriguez-Villodres A, Gil-Marques ML, Alvarez-Marin R, Bonnin RA, Pachon-Ibanez  
851 ME, Aguilar-Guisado M, et al. Extended-spectrum resistance to beta-lactams/beta-lactamase  
852 inhibitors (ESRI) evolved from low-level resistant *Escherichia coli*. *J Antimicrob Chemother.*  
853 2019.
- 854 11. Hansen KH, Andreasen MR, Pedersen MS, Westh H, Jelsbak L, Schonning K. Resistance  
855 to piperacillin/tazobactam in *Escherichia coli* resulting from extensive IS26-associated gene  
856 amplification of blaTEM-1. *J Antimicrob Chemother.* 2019;74(11):3179-83.
- 857 12. Poirel L, Heritier C, Spicq C, Nordmann P. In vivo acquisition of high-level resistance to  
858 imipenem in *Escherichia coli*. *J Clin Microbiol.* 2004;42(8):3831-3.
- 859 13. Oteo J, Delgado-Iribarren A, Vega D, Bautista V, Rodriguez MC, Velasco M, et al.  
860 Emergence of imipenem resistance in clinical *Escherichia coli* during therapy. *Int J Antimicrob*  
861 *Agents.* 2008;32(6):534-7.

- 862 14. Chia JH, Siu LK, Su LH, Lin HS, Kuo AJ, Lee MH, et al. Emergence of carbapenem-  
863 resistant *Escherichia coli* in Taiwan: resistance due to combined CMY-2 production and porin  
864 deficiency. *J Chemother.* 2009;21(6):621-6.
- 865 15. Dupont H, Choinier P, Roche D, Adiba S, Sookdeb M, Branger C, et al. Structural  
866 Alteration of OmpR as a Source of Ertapenem Resistance in a CTX-M-15-Producing *Escherichia*  
867 *coli* O25b:H4 Sequence Type 131 Clinical Isolate. *Antimicrob Agents Ch.* 2017;61(5).
- 868 16. Kao CY, Chen JW, Liu TL, Yan JJ, Wu JJ. Comparative Genomics of *Escherichia coli*  
869 Sequence Type 219 Clones From the Same Patient: Evolution of the IncI1 blaCMY-Carrying  
870 Plasmid in Vivo. *Front Microbiol.* 2018;9:1518.
- 871 17. Zou H, Xiong SJ, Lin QX, Wu ML, Niu SQ, Huang SF. CP-CRE/non-CP-CRE  
872 Stratification And CRE Resistance Mechanism Determination Help In Better Managing CRE  
873 Bacteremia Using Ceftazidime-Avibactam And Aztreonam-Avibactam. *Infect Drug Resist.*  
874 2019;12:3017-27.
- 875 18. Shelburne SA, Kim J, Munita JM, Sahasrabhojane P, Shields RK, Press EG, et al. Whole-  
876 Genome Sequencing Accurately Identifies Resistance to Extended-Spectrum beta-Lactams for  
877 Major Gram-Negative Bacterial Pathogens. *Clin Infect Dis.* 2017;65(5):738-45.
- 878 19. Cao MD, Nguyen SH, Ganesamoorthy D, Elliott AG, Cooper MA, Coin LJ. Scaffolding  
879 and completing genome assemblies in real-time with nanopore sequencing. *Nat Commun.*  
880 2017;8:14515.
- 881 20. Harris PA, Taylor R, Thielke R, Payne J, Gonzalez N, Conde JG. Research electronic  
882 data capture (REDCap)--a metadata-driven methodology and workflow process for providing  
883 translational research informatics support. *J Biomed Inform.* 2009;42(2):377-81.
- 884 21. Institute CaLS. Performance Standards for Antimicrobial Susceptibility Testing. CLSI  
885 supplement M100. 2018.
- 886 22. Bolger AM, Lohse M, Usadel B. Trimmomatic: a flexible trimmer for Illumina sequence  
887 data. *Bioinformatics.* 2014;30(15):2114-20.
- 888 23. Bankevich A, Nurk S, Antipov D, Gurevich AA, Dvorkin M, Kulikov AS, et al. SPAdes:  
889 a new genome assembly algorithm and its applications to single-cell sequencing. *J Comput Biol.*  
890 2012;19(5):455-77.
- 891 24. Kolmogorov M, Yuan J, Lin Y, Pevzner PA. Assembly of long, error-prone reads using  
892 repeat graphs. *Nat Biotechnol.* 2019;37(5):540-6.
- 893 25. Hunt M, Silva ND, Otto TD, Parkhill J, Keane JA, Harris SR. Circlator: automated  
894 circularization of genome assemblies using long sequencing reads. *Genome Biol.* 2015;16:294.
- 895 26. Vaser R, Sović, I., Nagarajan, N., & Šikić, M. Fast and accurate de novo genome  
896 assembly from long uncorrected reads. *Genome research.* 2017.
- 897 27. Page AJ, Cummins CA, Hunt M, Wong VK, Reuter S, Holden MT, et al. Roary: rapid  
898 large-scale prokaryote pan genome analysis. *Bioinformatics.* 2015;31(22):3691-3.
- 899 28. Löytynoja A. Phylogeny-aware alignment with PRANK. Totowa, NJ: Humana Press;  
900 2014.
- 901 29. Stamatakis A. RAxML version 8: a tool for phylogenetic analysis and post-analysis of  
902 large phylogenies. *Bioinformatics.* 2014;30(9):1312-3.
- 903 30. Jolley KA, & Maiden, M. C. BIGSdb: scalable analysis of bacterial genome variation at  
904 the population level. *BMC bioinformatics.* 2010;11(1):595.
- 905 31. Seemann T. Prokka: rapid prokaryotic genome annotation. *Bioinformatics.*  
906 2014;30(14):2068-9.

- 907 32. Jia B, Raphenya AR, Alcock B, Waglechner N, Guo P, Tsang KK, et al. CARD 2017:  
908 expansion and model-centric curation of the comprehensive antibiotic resistance database.  
909 *Nucleic Acids Res.* 2017;45(D1):D566-D73.
- 910 33. Carattoli A, Zankari E, Garcia-Fernandez A, Voldby Larsen M, Lund O, Villa L, et al. In  
911 silico detection and typing of plasmids using PlasmidFinder and plasmid multilocus sequence  
912 typing. *Antimicrob Agents Chemother.* 2014;58(7):3895-903.
- 913 34. Siguier P, Perochon J, Lestrade L, Mahillon J, Chandler M. ISfinder: the reference centre  
914 for bacterial insertion sequences. *Nucleic Acids Res.* 2006;34(Database issue):D32-6.
- 915 35. Hanson B, Johnson J, Leopold S, Sodergren E, Weinstock G. SVants – A long-read based  
916 method for structural variation detection in bacterial genomes. *bioRxiv.* 2019:822312.
- 917 36. Dumas JL, van Delden C, Perron K, Kohler T. Analysis of antibiotic resistance gene  
918 expression in *Pseudomonas aeruginosa* by quantitative real-time-PCR. *FEMS Microbiol Lett.*  
919 2006;254(2):217-25.
- 920 37. Adler M, Anjum M, Berg OG, Andersson DI, Sandegren L. High fitness costs and  
921 instability of gene duplications reduce rates of evolution of new genes by duplication-divergence  
922 mechanisms. *Mol Biol Evol.* 2014;31(6):1526-35.
- 923 38. Gibson DG, Young L, Chuang RY, Venter JC, Hutchison CA, 3rd, Smith HO. Enzymatic  
924 assembly of DNA molecules up to several hundred kilobases. *Nature methods.* 2009;6(5):343-5.
- 925 39. Partridge SR, Zong Z, Iredell JR. Recombination in IS26 and Tn2 in the evolution of  
926 multiresistance regions carrying blaCTX-M-15 on conjugative IncF plasmids from *Escherichia*  
927 *coli*. *Antimicrob Agents Chemother.* 2011;55(11):4971-8.
- 928 40. Sandegren L, Linkevicius M, Lytsy B, Melhus A, Andersson DI. Transfer of an  
929 *Escherichia coli* ST131 multiresistance cassette has created a *Klebsiella pneumoniae*-specific  
930 plasmid associated with a major nosocomial outbreak. *J Antimicrob Chemother.* 2012;67(1):74-  
931 83.
- 932 41. Partridge SR. Analysis of antibiotic resistance regions in Gram-negative bacteria. *FEMS*  
933 *Microbiol Rev.* 2011;35(5):820-55.
- 934 42. Partridge SR, Kwong, S. M., Firth, N., S.O. Mobile Genetic Elements Associated with  
935 Antimicrobial Resistance. *Clin Microbiol Rev.* 2018;31(4):e00088-17.
- 936 43. He S, Hickman AB, Varani AM, Siguier P, Chandler M, Dekker JP, et al. Insertion  
937 Sequence IS26 Reorganizes Plasmids in Clinically Isolated Multidrug-Resistant Bacteria by  
938 Replicative Transposition. *MBio.* 2015;6(3):e00762.
- 939 44. Harmer CJ, Hall RM. IS26-Mediated Formation of Transposons Carrying Antibiotic  
940 Resistance Genes. *mSphere.* 2016;1(2).
- 941 45. Harmer CJ, Moran RA, Hall RM. Movement of IS26-associated antibiotic resistance  
942 genes occurs via a translocatable unit that includes a single IS26 and preferentially inserts  
943 adjacent to another IS26. *MBio.* 2014;5(5):e01801-14.
- 944 46. Anantham S, Hall RM. pCERC1, a small, globally disseminated plasmid carrying the  
945 dfrA14 cassette in the strA gene of the sul2-strA-strB gene cluster. *Microb Drug Resist.*  
946 2012;18(4):364-71.
- 947 47. Boyd DA, Tyler S, Christianson S, McGeer A, Muller MP, Willey BM, et al. Complete  
948 nucleotide sequence of a 92-kilobase plasmid harboring the CTX-M-15 extended-spectrum beta-  
949 lactamase involved in an outbreak in long-term-care facilities in Toronto, Canada. *Antimicrob*  
950 *Agents Chemother.* 2004;48(10):3758-64.
- 951 48. Iida S, Mollet B, Meyer J, Arber W. Functional characterization of the prokaryotic  
952 mobile genetic element IS26. *Molecular and General Genetics MGG.* 1984;198(1):84-9.



- 953 49. Harmer CJ, Hall RM. IS26-Mediated Precise Excision of the IS26-aphA1a  
954 Translocatable Unit. *MBio*. 2015;6(6):e01866-15.
- 955 50. Livermore DM, Day M, Cleary P, Hopkins KL, Toleman MA, Wareham DW, et al.  
956 OXA-1 beta-lactamase and non-susceptibility to penicillin/beta-lactamase inhibitor combinations  
957 among ESBL-producing *Escherichia coli*. *J Antimicrob Chemother*. 2018.
- 958 51. Evans BA, Amyes SG. OXA beta-lactamases. *Clin Microbiol Rev*. 2014;27(2):241-63.
- 959 52. Evans SR, Hujer AM, Jiang H, Hujer KM, Hall T, Marzan C, et al. Rapid Molecular  
960 Diagnostics, Antibiotic Treatment Decisions, and Developing Approaches to Inform Empiric  
961 Therapy: PRIMERS I and II. *Clin Infect Dis*. 2016;62(2):181-9.
- 962 53. Bevan ER, Jones AM, Hawkey PM. Global epidemiology of CTX-M beta-lactamases:  
963 temporal and geographical shifts in genotype. *J Antimicrob Chemother*. 2017;72(8):2145-55.
- 964 54. Mena A, Plasencia V, Garcia L, Hidalgo O, Ayestaran JI, Alberti S, et al.  
965 Characterization of a large outbreak by CTX-M-1-producing *Klebsiella pneumoniae* and  
966 mechanisms leading to in vivo carbapenem resistance development. *J Clin Microbiol*.  
967 2006;44(8):2831-7.
- 968 55. Stoesser N, Sheppard AE, Pankhurst L, De Maio N, Moore CE, Sebra R, et al.  
969 Evolutionary History of the Global Emergence of the *Escherichia coli* Epidemic Clone ST131.  
970 *mBio*. 2016;7(2):e02162.
- 971 56. Poirel L, Lartigue M-F, Decousser J-W, Nordmann P. ISEcp1B-mediated transposition of  
972 blaCTX-M in *Escherichia coli*. *Antimicrobial agents and chemotherapy*. 2005;49(1):447-50.
- 973 57. Zowawi HM, Forde BM, Alfaresi M, Alzarouni A, Farahat Y, Chong TM, et al. Stepwise  
974 evolution of pandrug-resistance in *Klebsiella pneumoniae*. *Sci Rep*. 2015;5:15082.
- 975 58. Simner PJ, Antar AAR, Hao S, Gurtowski J, Tamma PD, Rock C, et al. Antibiotic  
976 pressure on the acquisition and loss of antibiotic resistance genes in *Klebsiella pneumoniae*. *J*  
977 *Antimicrob Chemother*. 2018;73(7):1796-803.
- 978 59. Hernández-Allés S, Benedí VJ, Martínez-Martínez L, Pascual Á, Aguilar A, Tomás JM,  
979 et al. Development of resistance during antimicrobial therapy caused by insertion sequence  
980 interruption of porin genes. *Antimicrobial agents and chemotherapy*. 1999;43(4):937-9.
- 981 60. Doumith M, Ellington MJ, Livermore DM, Woodford N. Molecular mechanisms  
982 disrupting porin expression in ertapenem-resistant *Klebsiella* and *Enterobacter* spp. clinical  
983 isolates from the UK. *J Antimicrob Chemother*. 2009;63(4):659-67.
- 984 61. Vandecraen J, Chandler M, Aertsen A, Van Houdt R. The impact of insertion sequences  
985 on bacterial genome plasticity and adaptability. *Crit Rev Microbiol*. 2017;43(6):709-30.
- 986 62. Sandegren L, Andersson DI. Bacterial gene amplification: implications for the evolution  
987 of antibiotic resistance. *Nat Rev Microbiol*. 2009;7(8):578-88.
- 988 63. Andersson DI, Hughes D. Antibiotic resistance and its cost: is it possible to reverse  
989 resistance? *Nat Rev Microbiol*. 2010;8(4):260-71.
- 990 64. Leavitt A, Chmelnitsky I, Colodner R, Ofek I, Carmeli Y, Navon-Venezia S. Ertapenem  
991 resistance among extended-spectrum-beta-lactamase-producing *Klebsiella pneumoniae* isolates.  
992 *J Clin Microbiol*. 2009;47(4):969-74.
- 993 65. Nicoloff H, Hjort K, Levin BR, Andersson DI. The high prevalence of antibiotic  
994 heteroresistance in pathogenic bacteria is mainly caused by gene amplification. *Nat Microbiol*.  
995 2019;4(3):504-14.
- 996 66. Gullberg E, Albrecht LM, Karlsson C, Sandegren L, Andersson DI. Selection of a  
997 multidrug resistance plasmid by sublethal levels of antibiotics and heavy metals. *mBio*.  
998 2014;5(5):e01918-14.

999 67. Andersson DI, Nicoloff H, Hjort K. Mechanisms and clinical relevance of bacterial  
1000 heteroresistance. *Nat Rev Microbiol.* 2019;17(8):479-96.  
1001
